# Supplementary material for: Redox activation of halogen-bonding catalysts for organic synthesis
Source: Royal Society of Chemistry journal article supplement (doi:10.1039/d6sc02883g), 2026-06-08
Supplement: d6sc02883g1.pdf [file d6sc02883g1.pdf]

## Supplementary information

### Redox Activation of Halogen-Bonding Catalysts for Organic Synthesis

Sihem Groni,<sup>a†</sup> Sercan Akbaba,<sup>b†</sup> Uchral Otgonbayar,<sup>a</sup> Jérémy Forté,<sup>a</sup> Stefan M. Huber,<sup>c</sup> Sitthichok Kasemthaveechok,<sup>\*a</sup> Bernd Schöllhorn<sup>\*d</sup> and Claire Fave<sup>\*a</sup>

- Sorbonne Université, CNRS, Institut Parisien de Chimie Moléculaire, IPCM, 75005 Paris, France
- Université Paris Cité, CNRS, 75005 Paris, France
- Fakultät für Chemie und Biochemie, Ruhr-Universität Bochum Universitätsstraße 150, 44801 Bochum, Germany
- ITODYS UMR 7086, Université Paris Cité, CNRS, 75013 Paris, France

#### Table of Contents

|                                                                                              |           |
|----------------------------------------------------------------------------------------------|-----------|
| <b>1. General Information</b> .....                                                          | <b>2</b>  |
| <b>2. Synthesis and characterization</b> .....                                               | <b>3</b>  |
| <b>A. Synthesis procedure of Huisgen Click Addition</b> .....                                | <b>3</b>  |
| <b>B. General procedure for methylation of pyridine</b> .....                                | <b>4</b>  |
| <b>3. Crystal data and X-ray structure determination process</b> .....                       | <b>6</b>  |
| <b>A. Single-crystal growth conditions for X-ray analysis</b> .....                          | <b>6</b>  |
| <b>B. Crystal structures of Fc-1, (Fc-2)OTf, (Fc-2)I, Fc-3 and (Fc-4)OTf</b> .....           | <b>6</b>  |
| <b>C. Crystal and refinement data for Fc-1, (Fc-2)OTf, (Fc-2)I, Fc-3 and (Fc-4)OTf</b> ..... | <b>7</b>  |
| <b>4. Steady-state physical characterizations</b> .....                                      | <b>8</b>  |
| <b>5. Electrochemical Characterization</b> .....                                             | <b>10</b> |
| <b>6. Activation of XB donor for Freidel-Craft Alkylation</b> .....                          | <b>13</b> |
| <b>A. General Procedure for stoichiometric condition</b> .....                               | <b>13</b> |
| <b>B. General Procedure for catalysis</b> .....                                              | <b>13</b> |
| <b>C. Procedure for substrate concentration</b> .....                                        | <b>13</b> |
| <b>7. Reproducibility experiment</b> .....                                                   | <b>13</b> |
| <b>8. UV-vis analysis in the presence of substrate</b> .....                                 | <b>14</b> |
| <b>9. NMR spectra</b> .....                                                                  | <b>15</b> |
| <b>A. NMR spectra of Fc-1</b> .....                                                          | <b>15</b> |
| <b>B. NMR spectra of (Fc-2)OTf</b> .....                                                     | <b>15</b> |
| <b>C. NMR spectra of Fc-3</b> .....                                                          | <b>16</b> |
| <b>D. NMR spectra of (Fc-4)OTf</b> .....                                                     | <b>17</b> |
| <b>E. NMR spectra of (Fc-2)I</b> .....                                                       | <b>17</b> |
| <b>10. NMR spectra of catalysis experiment</b> .....                                         | <b>18</b> |
| <b>A. Reactivity with BHB – stoichiometric condition</b> .....                               | <b>18</b> |
| <b>B. Reactivity with BHC – stoichiometric condition</b> .....                               | <b>20</b> |
| <b>C. Reactivity with BHC – catalytic condition</b> .....                                    | <b>22</b> |
| <b>D. Reactivity with BHC – catalyst/substrate concentration</b> .....                       | <b>27</b> |
| <b>11. Cartesian coordinates of the optimized structures</b> .....                           | <b>28</b> |
| <b>12. References</b> .....                                                                  | <b>36</b> |

## 1. General Information

All manipulations unless stated otherwise were performed using Schlenk or glovebox techniques under dry argon or nitrogen atmosphere, respectively. THF was dried over Na/benzophenone, freshly distilled prior to use and stored under nitrogen atmosphere over molecular sieves (4Å). All commercial chemicals were purchased from suppliers and used as received.

NMR spectra ( $^1\text{H}$  and  $^{13}\text{C}$ ) were recorded on a Bruker AM 300 MHz or a Bruker AVANCE 400 MHz or a Bruker AVANCE 600 MHz spectrophotometer. Chemical shifts  $\delta$  are given in ppm and coupling constants  $J$  in Hz. Chemical shifts for  $^1\text{H}$  NMR spectra are referenced relative to residual protium in the deuterated solvent ( $^1\text{H}$   $\delta$  = 7.26 ppm,  $\text{CDCl}_3$ ,  $\delta$  = 5.32 ppm,  $\text{CD}_2\text{Cl}_2$ ,  $\delta$  = 2.50 ppm,  $\text{DMSO-}d_6$ ,  $\delta$  = 2.05 ppm, acetone- $d_6$ ).  $^{13}\text{C}$  shifts are referenced to deuterated solvent ( $\delta$  = 77.2 ppm for  $\text{CDCl}_3$ ,  $\delta$  = 53.8 ppm for  $\text{CD}_2\text{Cl}_2$ ,  $\delta$  = 39.5 ppm,  $\text{DMSO-}d_6$ ,  $\delta$  = 206.7 ppm, acetone- $d_6$ ). The following abbreviations are used for describing NMR spectra: s (singlet), d (doublet), t (triplet), td (triplet of doublets), ddd (doublet of doublets of doublets), vd (virtual doublet), vt (virtual triplet), br (broad). Thin-layer chromatography (TLC) was performed on aluminum sheets precoated with Merck 5735 Kieselgel 60F254. Column chromatography was carried out with Merck 5735 Kieselgel 60F (0.040-0.063 mm mesh).

High resolution mass spectra (HRMS) were obtained using a mass spectrometer MicroTOF from Bruker with an electron spray source (ESI) or an atmospheric pressure chemical ionization (APCI) source and a TOF detector at Institut Parisien de Chimie Moléculaire (FR 2769).

Electrochemical measurement: Cyclic voltammetry experiments were performed using a AUTOLAB potentiostat from Metrohm. The measurements were performed in a standard one-compartment three electrode cell containing 0.1 M solution of TBABF<sub>4</sub> in anhydrous MeCN/DCM mixture (1:1) at room temperature. Mechanically polished glassy carbon electrodes (carbon/platinum rod of 3 mm diameter, embedded in an insoluble polymer matrix) were employed as WEs for CV measurements and a platinum wire was used as the CE. A salt bridge containing the electrolyte was used to connect the electrochemical cell with a SCE.

UV-vis spectroscopy experiment was measured using a Agilent Technology Cary 60 UV-Vis spectrometer; the light source used for sample irradiation during spectrophotochemistry is a LED Kessil PR160L ( $\lambda_{\text{max}}$  = 390 nm, 52W).

Single crystals of each compound were selected, mounted on a cryoloop, and transferred into a cold nitrogen gas stream. Intensity data were collected on a Bruker Kappa APEX2 CCD diffractometer or a Rigaku XtaLAB Synergy diffractometer (for **(Fc-2)I**) using micro-focused Cu K $\alpha$  radiation, or graphite-monochromated Mo K $\alpha$  radiation (for **(Fc-2)OTf**). Data collection, unit-cell parameter determination, integration, and data reduction were performed using the Bruker APEX/SAINT<sup>1</sup> software suite at 200 K, or the CrysAlisPro<sup>2</sup> software suite at 170 K (for **(Fc-2)I**). The structures were solved using SHELXT<sup>3</sup> and refined by full-matrix least-squares methods on  $F^2$  using SHELXL<sup>4</sup> within the Olex2<sup>5</sup> software package or the WinGX<sup>6</sup> program suite. Non-hydrogen atoms were refined anisotropically.

The crystallographic data have been deposited at the Cambridge Crystallographic Data Centre (CCDC) under deposition numbers 2536425–2536429 and can be obtained free of charge via [www.ccdc.cam.ac.uk](http://www.ccdc.cam.ac.uk)

## 2. Synthesis and characterization

Azidoferrocene<sup>7</sup> and 3,5-bis(iodoethynyl)pyridine<sup>8</sup> was synthesized using reported synthetic methods in literature.

### A. Synthesis procedure of Huisgen Click Addition

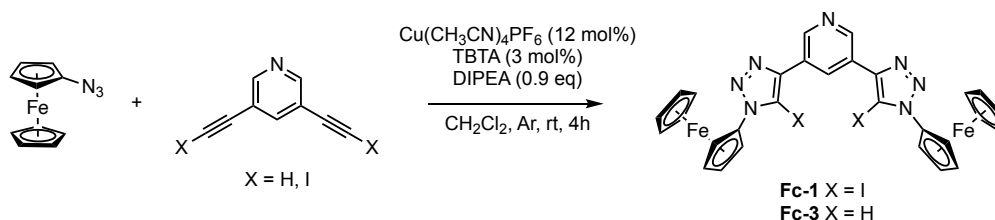

Synthesis was optimized according to the literature procedure.<sup>9</sup> In a round-bottom flask, the 3,5-diethynylpyridine (1.0 eq) and azidoferrocene (2.2 eq) was dissolved in dichloromethane (2 mL). To this solution was added a degassed dichloromethane solution (3 mL) containing  $\text{Cu}(\text{CH}_3\text{CN})_4\text{PF}_6$  (12 mol%), *N,N*-diisopropylethylamine (DIPEA, 0.9 eq), and tris(benzyltriazolylmethyl)amine (TBTA, 3 mol%). The reaction mixture was stirred at RT for 45 min. Upon completion, the mixture was diluted with dichloromethane (20 mL) and the organic phase was washed with  $2 \times 10$  mL of 10% aqueous  $\text{NH}_3$  containing 0.02 M EDTA, followed by several washes with distilled water. The product was purified by silica gel column chromatography using ethyl acetate/dichloromethane (30:70) as the eluent.

#### 3,5-bis(1-ferrocenyl-5-iodo-1H-1,2,3-triazol-4-yl)pyridine Fc-1

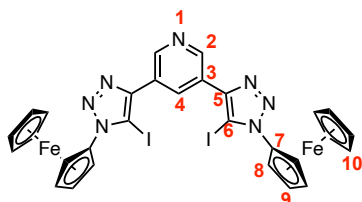

Synthesis with the above procedure from 200 mg of 3,5-bis(iodoethynyl)pyridine, an orange powder was obtained in 56 % yield (231 mg).

**<sup>1</sup>H NMR** ( $\text{CDCl}_3$ , 400 MHz):  $\delta$  (ppm) = 4.44 (s,  $10\text{H}^{10}$ ); 4.47 (t,  ${}^3\text{J}(\text{H},\text{H}) = 2.0$  Hz,  $4\text{H}^9$ ); 4.90 (t,  ${}^3\text{J}(\text{H},\text{H}) = 1.60$  Hz,  $4\text{H}^8$ ); 8.87 (t,  ${}^4\text{J}(\text{H},\text{H}) = 2.0$  Hz,  $1\text{H}^4$ ); 9.18 (d,  ${}^4\text{J}(\text{H},\text{H}) = 2.0$  Hz,  $2\text{H}^2$ ).

**<sup>13</sup>C NMR** ( $\text{CDCl}_3$ , 101 MHz):  $\delta$  (ppm) = 147.3 (s,  $\text{C}^5$ ), 146.6 (s,  $\text{C}^2$ ), 132.3 (s,  $\text{C}^4$ ), 126.3 (s,  $\text{C}^3$ ), 94.1 (s,  $\text{C}^7$ ), 86.3 (s,  $\text{C}^6$ ), 70.2 (s,  $\text{C}^{10}$ ), 66.9 (s,  $\text{C}^9$ ), 66.4 (s,  $\text{C}^8$ )

**HRMS (ESI)**  $m/z$ :  $[\text{M}+\text{Na}]^+$  Calcd for  $\text{C}_{29}\text{H}_{21}\text{Fe}_2\text{N}_7\text{I}$  833.8720. Found 833.8711; ( $\Delta = -1.0$  ppm).

#### 3,5-bis(1-ferrocenyl-1H-1,2,3-triazol-4-yl)pyridine Fc-3

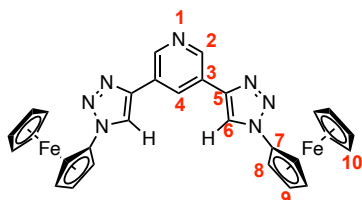

From 38 mg of 3,5-diethynylpyridine, an orange yellow powder was obtained in 70.5% yield (122 mg).

**<sup>1</sup>H NMR** ( $\text{CDCl}_3$ , 400 MHz):  $\delta$  (ppm) = 4.27 (s,  $10\text{H}^{10}$ ); 4.34 (t,  ${}^3\text{J}(\text{H},\text{H}) = 2.0$  Hz,  $4\text{H}^9$ ); 4.93 (t,  ${}^3\text{J}(\text{H},\text{H}) = 2.0$  Hz,  $4\text{H}^8$ ); 8.18 (s,  $2\text{H}^6$ ); 8.72 (t,  ${}^4\text{J}(\text{H},\text{H}) = 2.0$  Hz,  $1\text{H}^4$ ); 9.12 (d,  ${}^4\text{J}(\text{H},\text{H}) = 2.0$  Hz,  $2\text{H}^2$ ).

$^{13}\text{C}$  NMR ( $\text{CDCl}_3$ , 101 MHz):  $\delta$  (ppm) = 146.6 (s, C-H<sup>2</sup>), 144.5 (s, C-H<sup>5</sup>), 130.0 (s, C-H<sup>4</sup>), 126.8 (s, C-H<sup>3</sup>), 120.0 (s, C-H<sup>6</sup>), 93.6 (s, C-H<sup>7</sup>), 70.4 (s, C-H<sup>10</sup>), 67.0 (s, Cp-H<sup>9</sup>), 62.3 (s, Cp-H<sup>8</sup>).

HRMS (ESI)  $m/z$ :  $[\text{M}+\text{Na}]^+$  Calcd for  $\text{C}_{29}\text{H}_{23}\text{Fe}_2\text{N}_7\text{Na}$  604.0606. Found 604.0606; ( $\Delta = 0.0$  ppm).

## B. General procedure for methylation of pyridine

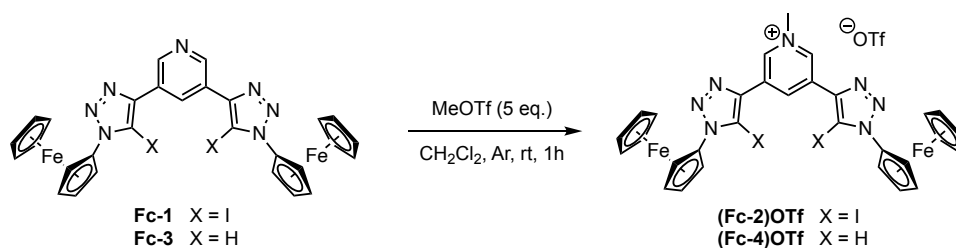

The procedure is adopted from literature.<sup>10</sup> Under an inert atmosphere, the ferrocene derivative (1.0 eq.) was dissolved in anhydrous dichloromethane, and alkylation agent was added. Methyl trifluoromethanesulfonate (5.0 eq.) was added. The reaction mixture was stirred at RT for 1 h. Upon formation of a fine precipitate, diethyl ether was added, and the mixture was centrifuged at 10,000 rpm and allow to precipitate at 15 °C for 30 min. The precipitate was collected.

### 3,5-bis(1-ferrocenyl-5-iodo-1H-1,2,3-triazol-4-yl)-1-methylpyridin-1-ium trifluoromethanesulfonate (Fc-2)OTf

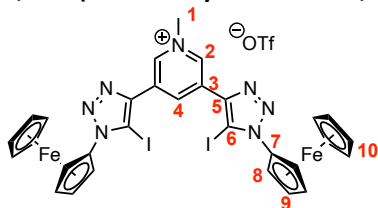

A red orange powder was obtained in 92 % yield.

$^1\text{H}$  NMR ( $\text{DMSO}-d_6$ , 400 MHz):  $\delta$  (ppm) = 4.44 (s,  $10\text{H}^{10}$ ); 4.51 (t,  $^3\text{J}(\text{H},\text{H}) = 2.0$  Hz,  $4\text{H}^9$ ); 4.58 (s,  $3\text{H}^1$ ); 4.94 (t,  $^3\text{J}(\text{H},\text{H}) = 2.0$  Hz,  $4\text{H}^8$ ); 9.58 (d,  $^4\text{J}(\text{H},\text{H}) = 1.70$  Hz,  $2\text{H}^2$ ); 9.61 (t,  $^4\text{J}(\text{H},\text{H}) = 1.70$  Hz,  $1\text{H}^4$ ).

$^{13}\text{C}$  NMR ( $\text{DMSO}-d_6$ , 101 MHz):  $\delta$  (ppm) = 143.8 (s,  $\text{C}^3$ ), 142.7 (s,  $\text{C}^2$ ), 137.6 (s,  $\text{C}^4$ ), 130.3 (s,  $\text{C}^5$ ), 93.8 (s,  $\text{C}^7$ ), 88.6 (s,  $\text{C}^6$ ), 70.3 (s,  $\text{C}^{10}$ ), 67.2 (s,  $\text{C}^9$ ), 66.2 (s,  $\text{C}^8$ ), 48.8 (s,  $\text{C}^1$ ).

$^{19}\text{F}$  NMR ( $\text{DMSO}-d_6$ , 125 MHz):  $\delta$  (ppm) = -78.7

HRMS (ESI)  $m/z$ :  $[\text{M}]^+$  Calcd for  $\text{C}_{30}\text{H}_{24}\text{Fe}_2\text{I}_2\text{N}_7$  847.8876. Found 847.8878; ( $\Delta = 0.2$  ppm).

### 3,5-bis(1-ferrocenyl-1H-1,2,3-triazol-4-yl)-1-methylpyridin-1-ium trifluoromethanesulfonate (Fc-4)OTf

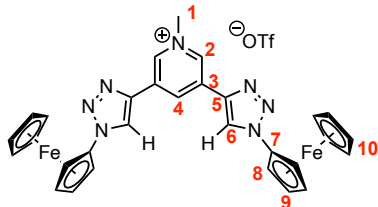

A red orange powder was obtained in 89 % yield.

$^1\text{H}$  NMR ( $\text{Acetone}-d_6$ , 400 MHz):  $\delta$  (ppm) = 4.29 (s,  $10\text{H}^{10}$ ); 4.44 (t,  $^3\text{J}(\text{H},\text{H}) = 2.0$  Hz,  $4\text{H}^9$ ); 4.84 (s,  $3\text{H}^1$ ); 5.14 (t,  $^3\text{J}(\text{H},\text{H}) = 2.0$  Hz,  $4\text{H}^8$ ); 9.40 (s,  $2\text{H}^6$ ); 9.46 (t,  $^4\text{J}(\text{H},\text{H}) = 2.0$  Hz,  $1\text{H}^4$ ), 9.59 (d,  $^4\text{J}(\text{H},\text{H}) = 2.0$  Hz,  $2\text{H}^2$ ).

$^{13}\text{C}$  NMR ( $\text{Acetone}-d_6$ , 101 MHz):  $\delta$  (ppm) = 141.8 (s,  $\text{C}^5$ ), 141.4 (s,  $\text{C}^2$ ), 136.7 (s,  $\text{C}^4$ ), 133 (s,  $\text{C}^3$ ), 124.4 (s,  $\text{C}^6$ ), 94.3 (s,  $\text{C}^7$ ), 71.1 (s,  $\text{C}^{10}$ ), 68.0 (s,  $\text{C}^9$ ), 63.0 (s,  $\text{C}^8$ ), 49.8 (s,  $\text{C}^1$ ).

$^{19}\text{F}$  NMR (Acetone- $d_6$ , 125 MHz):  $\delta$  (ppm) = -79.8

HRMS (ESI)  $m/z$ :  $[\text{M}]^+$  Calcd for  $\text{C}_{30}\text{H}_{26}\text{Fe}_2\text{N}_7$  596.0944. Found 596.0943; ( $\Delta$  = -0.2 ppm).

### 3,5-bis(1-ferrocenyl-5-iodo-1H-1,2,3-triazol-4-yl)-1-methylpyridin-1-ium iodide (Fc-2)

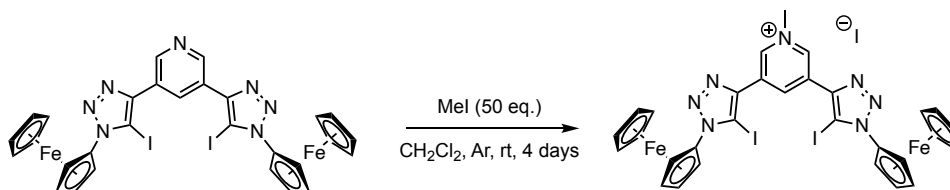

Under an inert atmosphere, 100 mg **Fc-1** (0.12 mmol) was dissolved in anhydrous dichloromethane 3 mL, and alkylation agent was added. For the alkylation with iodomethane, 370 mL (50 eq.) of the methyl iodide were added and allowed to stir for 4 days at room temperature. The precipitate was washed twice by dichloromethane and centrifuged at 10,000 rpm and stored at 15 °C for 30 min. A product was obtained as red orange powder (90 mg, 77 % yield).

$^1\text{H}$  NMR (DMSO- $d_6$ , 400 MHz):  $\delta$  (ppm) = 4.44 (s, 10H<sup>10</sup>); 4.51 (t,  $^3\text{J}(\text{H},\text{H}) = 2.0$  Hz, 4H<sup>9</sup>); 4.58 (s, 3H<sup>1</sup>) ; 4.94 (t,  $^3\text{J}(\text{H},\text{H}) = 2.0$  Hz, 4H<sup>8</sup>); 9.58 (d,  $^4\text{J}(\text{H},\text{H}) = 1.70$  Hz, 2H<sup>2</sup>), 9.62 (t,  $^4\text{J}(\text{H},\text{H}) = 1.70$  Hz, 1H<sup>4</sup>).

$^{13}\text{C}$  NMR (DMSO- $d_6$ , 101 MHz):  $\delta$  (ppm) = 143.8 (s, C<sup>5</sup>), 130.3 (s, C<sup>3</sup>), 93.9 (s, C<sup>7</sup>), 70.3 (s, C<sup>10</sup>), 64.9 (s, C<sup>6</sup>), 67.2 (s, C<sup>9</sup>), 66.2 (s, C<sup>8</sup>), 48.8 (s, C<sup>1</sup>).

### 3. Crystal data and X-ray structure determination process

#### A. Single-crystal growth conditions for X-ray analysis

- For **Fc-1**, dark orange crystals were obtained by slow evaporation of an ethyl acetate/dichloromethane solution (3:7). The samples were stored at 4 °C for less than one week to control crystal growth.
- For **(Fc-2)OTf**, red-orange crystals were obtained by slow diffusion of diethyl ether into an acetonitrile solution. The samples were stored at 4 °C for less than one week.
- For **(Fc-2)I**, dark brown crystals were obtained by slow evaporation of a DMF solution at room temperature.
- For **Fc-3**, yellow crystals were obtained at room temperature by slow evaporation of the column eluent (ethyl acetate/petroleum ether, 80:20).
- For **(Fc-4)OTf**, orange crystals were obtained by slow diffusion of diethyl ether into an acetone solution. The samples were stored at 4 °C for one week to control crystal growth.

#### B. Crystal structures of Fc-1, (Fc-2)OTf, (Fc-2)I, Fc-3 and (Fc-4)OTf

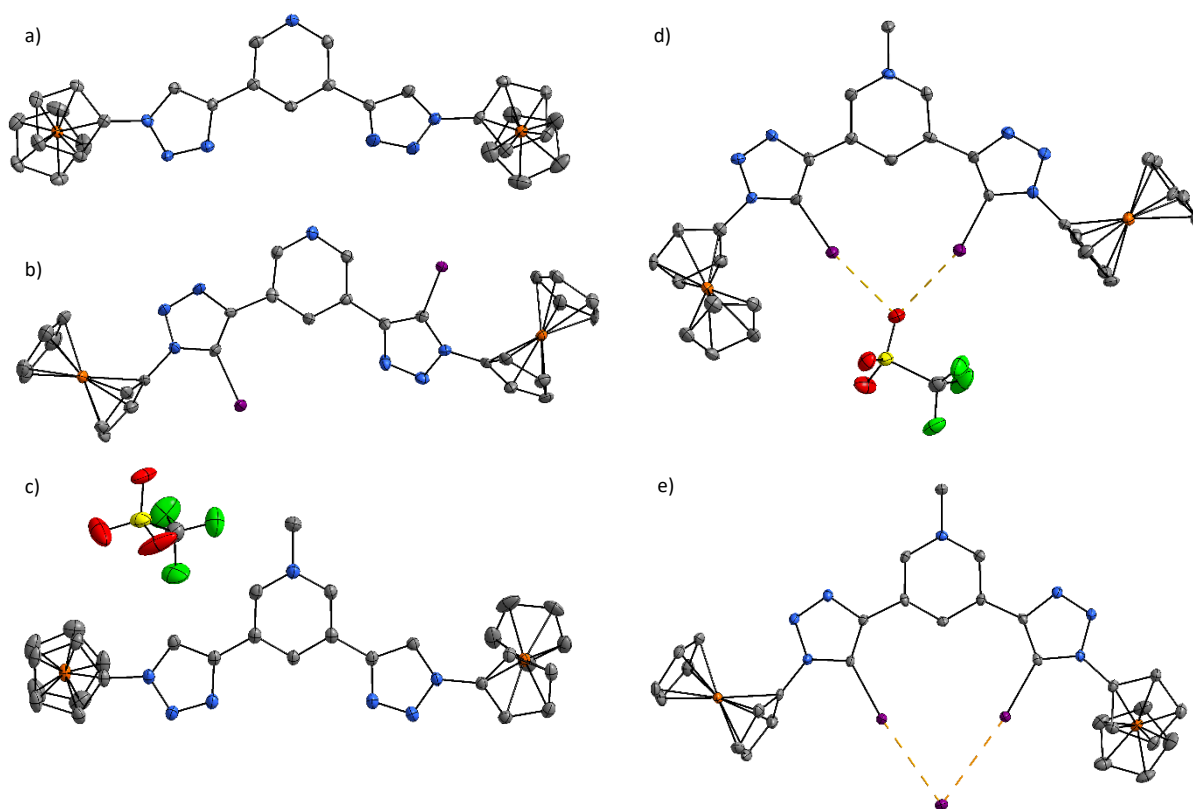

**Figure S1.** Crystal structures (ORTEP representations) of (a) **Fc-3**, (b) **Fc-1**, (c) **(Fc-4)OTf**, (d) **(Fc-2)OTf** and (e) **(Fc-2)I**. Thermal ellipsoids are drawn at the 30% probability level. Atom colour code: purple (I), red (O), yellow (S), green (F), orange (Fe), blue (N), and grey (C). Halogen bonding interactions in [d] and [e] are shown as orange dotted lines. Hydrogen atoms, solvent molecules (DCM for [a], acetone for [c], acetonitrile for [d] and DMF for [e]), the second molecule in the asymmetric unit of [c], and the second position of the disordered Cp group in [d] are omitted for clarity.

### C. Crystal and refinement data for Fc-1, (Fc-2)OTf, (Fc-2)I, Fc-3 and (Fc-4)OTf

Table S1:

|                                                   | Fc-1                                                                          | (Fc-2)OTf                                                                                                                                                                       | (Fc-2)I                                                                                                                                        | Fc-3                                                                                             | (Fc-4)OTf                                                                                                                                                          |
|---------------------------------------------------|-------------------------------------------------------------------------------|---------------------------------------------------------------------------------------------------------------------------------------------------------------------------------|------------------------------------------------------------------------------------------------------------------------------------------------|--------------------------------------------------------------------------------------------------|--------------------------------------------------------------------------------------------------------------------------------------------------------------------|
| <b>CCDC deposit number</b>                        | 2536426                                                                       | 2536428                                                                                                                                                                         | 2536429                                                                                                                                        | 2536425                                                                                          | 2536427                                                                                                                                                            |
| <b>Empirical formula<sup>a</sup></b>              | C <sub>29</sub> H <sub>21</sub> Fe <sub>2</sub> I <sub>2</sub> N <sub>7</sub> | C <sub>35</sub> H <sub>30</sub> F <sub>3</sub> Fe <sub>2</sub> I <sub>2</sub> N <sub>9</sub> O <sub>3</sub> S                                                                   | C <sub>33</sub> H <sub>31</sub> N <sub>8</sub> OFe <sub>2</sub> I <sub>3</sub>                                                                 | C <sub>30</sub> H <sub>25</sub> Cl <sub>2</sub> Fe <sub>2</sub> N <sub>7</sub>                   | C <sub>32.5</sub> H <sub>29</sub> N <sub>7</sub> O <sub>3.5</sub> F <sub>3</sub> SFe <sub>2</sub>                                                                  |
| <b>Moiety Formula</b>                             | C <sub>29</sub> H <sub>21</sub> Fe <sub>2</sub> I <sub>2</sub> N <sub>7</sub> | C <sub>30</sub> H <sub>24</sub> Fe <sub>2</sub> I <sub>2</sub> N <sub>7</sub> <sup>+</sup> , CF <sub>3</sub> O <sub>3</sub> S <sup>-</sup> , 2(C <sub>2</sub> H <sub>3</sub> N) | C <sub>30</sub> H <sub>24</sub> Fe <sub>2</sub> I <sub>2</sub> N <sub>7</sub> <sup>+</sup> , I <sup>-</sup> , C <sub>3</sub> H <sub>7</sub> NO | C <sub>29</sub> H <sub>23</sub> Fe <sub>2</sub> N <sub>7</sub> , CH <sub>2</sub> Cl <sub>2</sub> | C <sub>30</sub> H <sub>26</sub> Fe <sub>2</sub> N <sub>7</sub> <sup>+</sup> , CF <sub>3</sub> O <sub>3</sub> S <sup>-</sup> , 0.5(C <sub>3</sub> H <sub>6</sub> O) |
| <b>Formula weight (g/mol)</b>                     | 833.03                                                                        | 1079.24                                                                                                                                                                         | 1048.06                                                                                                                                        | 666.17                                                                                           | 774.39                                                                                                                                                             |
| <b>Temperature (K)</b>                            | 200                                                                           | 200                                                                                                                                                                             | 170                                                                                                                                            | 200                                                                                              | 200                                                                                                                                                                |
| <b>Crystal system</b>                             | Monoclinic                                                                    | Monoclinic                                                                                                                                                                      | Monoclinic                                                                                                                                     | Monoclinic                                                                                       | Triclinic                                                                                                                                                          |
| <b>Space group</b>                                | <i>P</i> 2 <sub>1</sub> / <i>c</i>                                            | <i>P</i> 2 <sub>1</sub> / <i>c</i>                                                                                                                                              | <i>P</i> 2 <sub>1</sub> / <i>c</i>                                                                                                             | <i>P</i> 2 <sub>1</sub> / <i>c</i>                                                               | <i>P</i> -1                                                                                                                                                        |
| <b>a (Å)</b>                                      | 19.7188(10)                                                                   | 8.2870(5)                                                                                                                                                                       | 7.67655(14)                                                                                                                                    | 5.7498(3)                                                                                        | 10.1900(2)                                                                                                                                                         |
| <b>b (Å)</b>                                      | 7.3791(3)                                                                     | 25.7120(14)                                                                                                                                                                     | 24.6328(4)                                                                                                                                     | 16.4645(8)                                                                                       | 14.7294(2)                                                                                                                                                         |
| <b>c (Å)</b>                                      | 20.4086(12)                                                                   | 17.9654(10)                                                                                                                                                                     | 18.0523(3)                                                                                                                                     | 28.9636(12)                                                                                      | 22.1574(3)                                                                                                                                                         |
| <b>α (°)</b>                                      | 90                                                                            | 90                                                                                                                                                                              | 90                                                                                                                                             | 90                                                                                               | 79.1450(10)                                                                                                                                                        |
| <b>β (°)</b>                                      | 110.565(3)                                                                    | 98.175(2)                                                                                                                                                                       | 94.4505(15)                                                                                                                                    | 94.275(3)                                                                                        | 81.1440(10)                                                                                                                                                        |
| <b>γ (°)</b>                                      | 90                                                                            | 90                                                                                                                                                                              | 90                                                                                                                                             | 90                                                                                               | 82.0860(10)                                                                                                                                                        |
| <b>Volume (Å<sup>3</sup>)</b>                     | 2780.4(2)                                                                     | 3789.1(4)                                                                                                                                                                       | 3403.32(10)                                                                                                                                    | 2734.3(2)                                                                                        | 3206.91(9)                                                                                                                                                         |
| <b>Z</b>                                          | 4                                                                             | 4                                                                                                                                                                               | 4                                                                                                                                              | 4                                                                                                | 4                                                                                                                                                                  |
| <b>ρ<sub>calc</sub> (g/cm<sup>3</sup>)</b>        | 1.990                                                                         | 1.892                                                                                                                                                                           | 2.045                                                                                                                                          | 1.618                                                                                            | 1.604                                                                                                                                                              |
| <b>Absorption coefficient μ (mm<sup>-1</sup>)</b> | 26.073 (CuKα)                                                                 | 2.515 (MoKα)                                                                                                                                                                    | 28.534 (CuKα)                                                                                                                                  | 10.592 (CuKα)                                                                                    | 8.442 (CuKα)                                                                                                                                                       |
| <b>F(000)</b>                                     | 1608                                                                          | 2112                                                                                                                                                                            | 2016                                                                                                                                           | 1360                                                                                             | 1584                                                                                                                                                               |
| <b>Crystal size (mm<sup>2</sup>)</b>              | 0.21 × 0.04 × 0.04                                                            | 0.26 × 0.04 × 0.04                                                                                                                                                              | 0.09 × 0.02 × 0.01                                                                                                                             | 0.18 × 0.03 × 0.02                                                                               | 0.15 × 0.09 × 0.04                                                                                                                                                 |
| <b>Wavelength λ (Å)</b>                           | 1.54178                                                                       | 0.71073                                                                                                                                                                         | 1.54178                                                                                                                                        | 1.54178                                                                                          | 1.54178                                                                                                                                                            |
| <b>2θ range (°)</b>                               | 4.786 - 124.998                                                               | 4.582 - 50.09                                                                                                                                                                   | 6.082 - 132.946                                                                                                                                | 6.12 - 125.468                                                                                   | 6.148 - 133.19                                                                                                                                                     |
| <b>Miller indexes ranges</b>                      | -22 ≤ h ≤ 22,<br>-8 ≤ k ≤ 8,<br>-23 ≤ l ≤ 23                                  | -9 ≤ h ≤ 9,<br>-30 ≤ k ≤ 30,<br>-21 ≤ l ≤ 21                                                                                                                                    | -9 ≤ h ≤ 9,<br>-29 ≤ k ≤ 28,<br>-20 ≤ l ≤ 21                                                                                                   | -6 ≤ h ≤ 6,<br>-18 ≤ k ≤ 18,<br>-30 ≤ l ≤ 33                                                     | -10 ≤ h ≤ 12,<br>-17 ≤ k ≤ 17,<br>-26 ≤ l ≤ 26                                                                                                                     |
| <b>Measured reflections</b>                       | 23543                                                                         | 34719                                                                                                                                                                           | 21204                                                                                                                                          | 21021                                                                                            | 42765                                                                                                                                                              |
| <b>Unique reflections</b>                         | 4434                                                                          | 6699                                                                                                                                                                            | 5981                                                                                                                                           | 4354                                                                                             | 11327                                                                                                                                                              |
| <b>R<sub>int</sub> / R<sub>sigma</sub></b>        | 0.1193 / 0.0793                                                               | 0.1091 / 0.0915                                                                                                                                                                 | 0.0573 / 0.0505                                                                                                                                | 0.1452 / 0.1032                                                                                  | 0.0666 / 0.0621                                                                                                                                                    |
| <b>Reflections [I ≥ 2σ(I)]</b>                    | 3152                                                                          | 4129                                                                                                                                                                            | 5203                                                                                                                                           | 2917                                                                                             | 8947                                                                                                                                                               |
| <b>Restraints</b>                                 | 60                                                                            | 171                                                                                                                                                                             | 0                                                                                                                                              | 30                                                                                               | 53                                                                                                                                                                 |
| <b>Parameters</b>                                 | 361                                                                           | 544                                                                                                                                                                             | 427                                                                                                                                            | 388                                                                                              | 887                                                                                                                                                                |
| <b>Goodness-of-fit F<sup>2</sup></b>              | 0.973                                                                         | 1.004                                                                                                                                                                           | 1.028                                                                                                                                          | 1.006                                                                                            | 1.032                                                                                                                                                              |
| <b>Final R indexes<sup>b,c</sup> [all data]</b>   | R <sub>1</sub> = 0.0832,<br>wR <sub>2</sub> = 0.1272                          | R <sub>1</sub> = 0.1020,<br>wR <sub>2</sub> = 0.0937                                                                                                                            | R <sub>1</sub> = 0.0449,<br>wR <sub>2</sub> = 0.1099                                                                                           | R <sub>1</sub> = 0.1051,<br>wR <sub>2</sub> = 0.1616                                             | R <sub>1</sub> = 0.0733,<br>wR <sub>2</sub> = 0.1563                                                                                                               |
| <b>Final R indexes<sup>b,c</sup> [I ≥ 2σ(I)]</b>  | R <sub>1</sub> = 0.0526,<br>wR <sub>2</sub> = 0.1178                          | R <sub>1</sub> = 0.0449,<br>wR <sub>2</sub> = 0.0769                                                                                                                            | R <sub>1</sub> = 0.0386,<br>wR <sub>2</sub> = 0.1058                                                                                           | R <sub>1</sub> = 0.0621,<br>wR <sub>2</sub> = 0.1394                                             | R <sub>1</sub> = 0.0566,<br>wR <sub>2</sub> = 0.1442                                                                                                               |
| <b>Largest diff. peak/hole (e/Å<sup>3</sup>)</b>  | 2.20 / -0.94                                                                  | 0.79 / -0.57                                                                                                                                                                    | 1.16 / -0.82                                                                                                                                   | 0.56 / -0.71                                                                                     | 0.99 / -0.95                                                                                                                                                       |

<sup>a</sup> Including solvent molecules (if presence)

$$^b R1 = \sum ||F_o| - |F_c|| / \sum |F_o|$$

$$^c wR2 = \sqrt{\sum (w(F_o^2 - F_c^2)) / \sum (w(F_o^2)^2)}$$

## 4. Steady-state physical characterizations

### A. Neutral state characterization

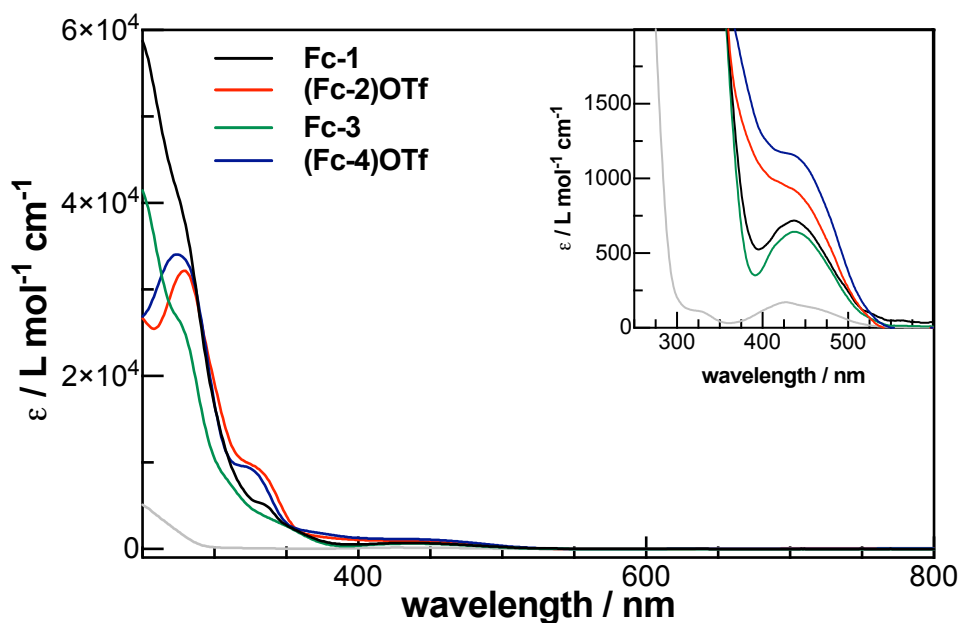

**Figure S2.** UV-vis spectra of compound **Fc-1** (black), **(Fc-2)OTf** (red), **Fc-3** (green), **(Fc-4)OTf** (blue), and Ferrocene (grey) in 1:1 dichloromethane/acetonitrile (ca.  $10^{-5}$  M) at 298 K.

**Table S2:** UV-Vis characterization of Fc derivatives in 1:1 dichloromethane/acetonitrile (ca.  $10^{-5}$  M) at 298 K.

| Compound          | $\lambda_{\max}$ [a] | $\epsilon$ [b] |
|-------------------|----------------------|----------------|
| Fc                | 427                  | 170            |
| Fc-1              | 437                  | 718            |
| Fc-2 <sup>+</sup> | 436                  | 1157           |
| Fc-3              | 437                  | 635            |
| Fc-4 <sup>+</sup> | 441                  | 900            |

[a] = nm ; [b] =  $\text{L mol}^{-1} \text{cm}^{-1}$

**Table S3:** Redox potential of Fc derivatives

| Compound          | $E_p^1$ (C-I) [a] | $E_p^2$ (N <sup>+</sup> ) [a] | $E_p^3$ (Fc→Fc <sup>+</sup> ) [a] | D [b]                 |
|-------------------|-------------------|-------------------------------|-----------------------------------|-----------------------|
| Fc                | -                 | -                             | 0.53                              | -                     |
| Fc-1              | -1.40             | -                             | 0.70                              | $3.62 \times 10^{-5}$ |
| Fc-2 <sup>+</sup> | -1.55             | -1.09                         | 0.75                              | $2.52 \times 10^{-5}$ |
| Fc-3              | -                 | -                             | 0.68                              | $2.92 \times 10^{-5}$ |
| Fc-4 <sup>+</sup> | -                 | -1.07                         | 0.72                              | $3.86 \times 10^{-5}$ |

[a] = V vs SCE; [b] =  $\text{cm}^2 \text{s}^{-1}$

## B. Ferrocenium state characterization

**Table S4:** UV-Vis characterization of ferrocenium derivatives in in 1:1 dichloromethane/acetonitrile (ca.  $10^{-5}$  M) at 298 K in presence of 1.2 equiv of  $\text{NOBF}_4$  (per ferrocene).

| Compound             | $\lambda$ max <sup>[a]</sup> | $\epsilon$ <sup>[b]</sup> | $t_{1/2}$ <sup>[c]</sup> |
|----------------------|------------------------------|---------------------------|--------------------------|
| $\text{Fc}^+$        | 617                          | 641                       | -                        |
| $\text{Fc-1}^{2+}$   | 642                          | 1341                      | 15                       |
| $(\text{Fc-2})^{3+}$ | 642                          | 1421                      | 200                      |
| $\text{Fc-3}^{2+}$   | 690                          | 851                       | 8                        |
| $(\text{Fc-4})^{3+}$ | 688                          | 984                       | 6.7                      |

[a] = nm ; [b] =  $\text{L mol}^{-1} \text{cm}^{-1}$ ; [c] = min

## C. Half-lives determination

All ferrocenium species were prepared by oxidation with  $\text{NOBF}_4$  (2.2 eq per ferrocene). The kinetic stabilities of the cationic ferrocenium were followed by UV-vis measurement under Ar.

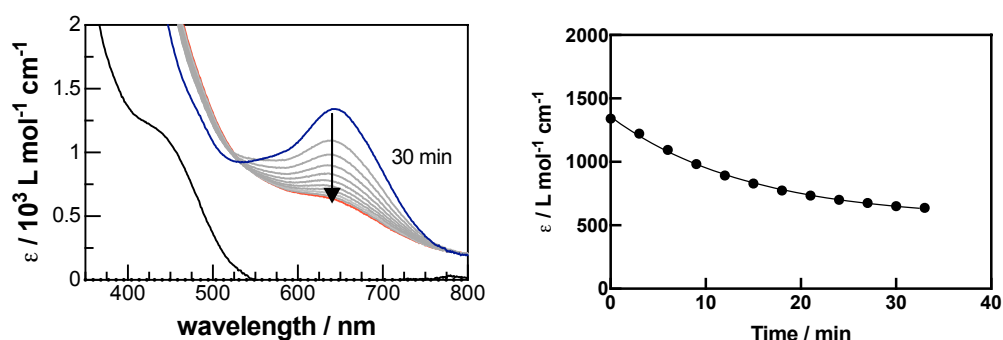

**Figure S3.** Left) Time-dependent UV-vis absorption spectra of  $\text{Fc-1}^{2+} \cdot 2\text{BF}_4^-$  in 1:1 dichloromethane/acetonitrile under Ar at 298 K (blue trace). For comparison UV spectrum of  $\text{Fc-1}$  has been added (black curve). Right) Exponential decay fitting plot as a function of time at 642 nm.

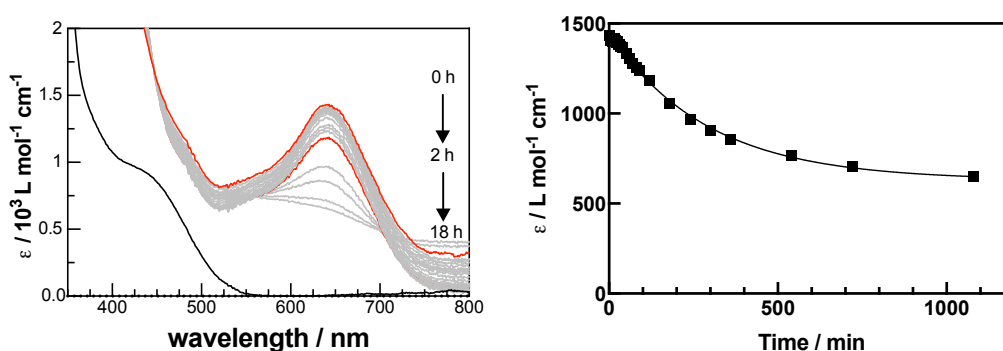

**Figure S4.** Left) Time-dependent UV-vis absorption spectra of  $(\text{Fc-2})^{3+} \cdot 2\text{BF}_4^- \cdot \text{OTf}^-$  in 1:1 dichloromethane/acetonitrile under Ar at 298 K (blue trace). For comparison UV spectrum of  $\text{Fc-2}^+$  has been added (black curve).. Right) Exponential decay fitting plot as a function of time at 642 nm.

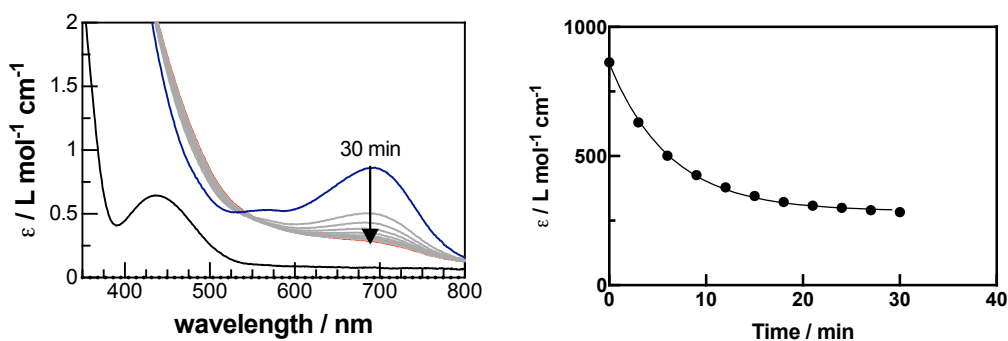

**Figure S5. Left)** Time-dependent UV-vis absorption spectra of  $\text{Fc-3}^{2+}\cdot 2\text{BF}_4^-$  in 1:1 dichloromethane/acetonitrile under Ar at 298 K (blue trace). For comparison UV spectrum of  $\text{Fc-3}$  has been added (black curve). **Right)** Exponential decay fitting plot as a function of time at 690 nm.

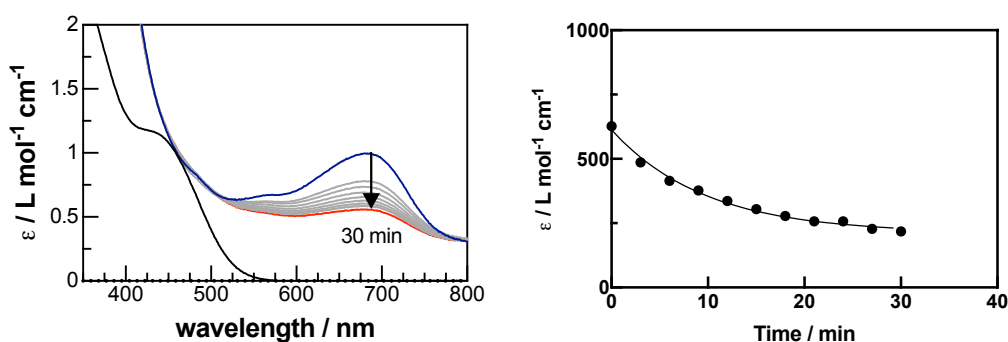

**Figure S6. Left)** Time-dependent UV-vis absorption spectra of  $(\text{Fc-4})^{3+}\cdot 2\text{BF}_4^-\text{OTf}^-$  in 1:1 dichloromethane/acetonitrile under Ar at 298 K (blue trace). For comparison UV spectrum of  $\text{Fc-4}^+$  has been added (black curve).. **Right)** Exponential decay fitting plot as a function of time at 688 nm.

## 5. Electrochemical Characterization

### A. Fc derivatives in solution

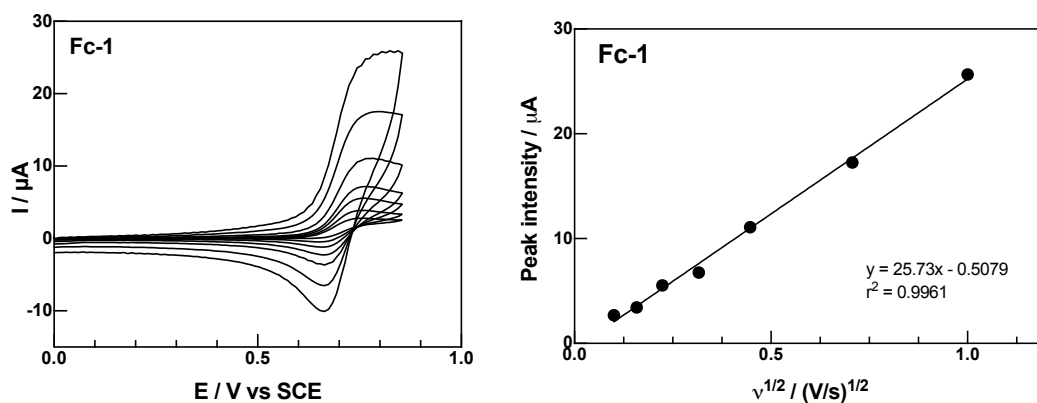

**Figure S7. Left)** CVs of compound  $\text{Fc-1}$  ( $c = 0.25 \text{ mM}$ ) in a solution of  $0.1\text{M TBABF}_4 \text{ CH}_2\text{Cl}_2/\text{ACN}$  (1/1) at various scan rate from  $25 \text{ mV}\cdot\text{s}^{-1}$  to  $1 \text{ V}\cdot\text{s}^{-1}$ ; **Right)** Plot of the peak current versus the square root of the scan rate. Right) WE = GC electrode, RE = SCE.

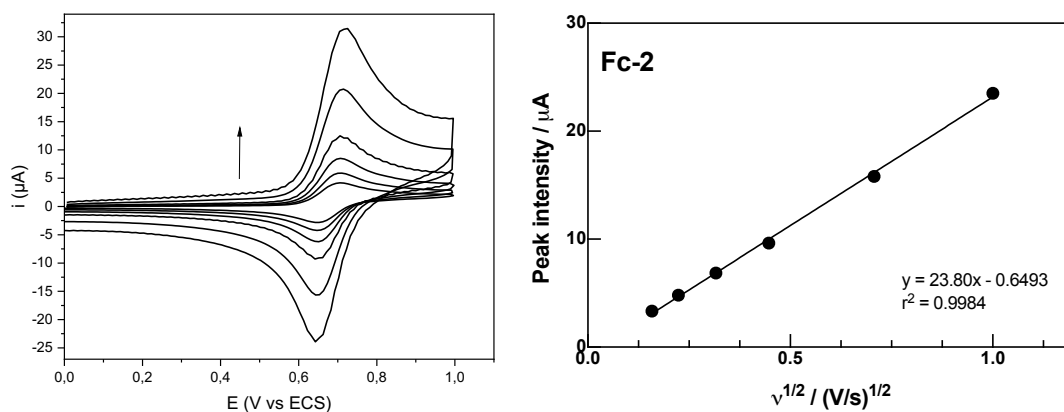

**Figure S8. Left)** CVs of compound **Fc-2** ( $c = 0.25 \text{ mM}$ ) in a solution of  $0.1\text{M TBABF}_4 \text{ CH}_2\text{Cl}_2/\text{ACN}$  (1/1) at various scan rate from  $25 \text{ mV}\cdot\text{s}^{-1}$  to  $1 \text{ V}\cdot\text{s}^{-1}$ ; **Right)** Plot of the peak current versus the square root of the scan rate. Right) WE = GC electrode, RE = SCE.

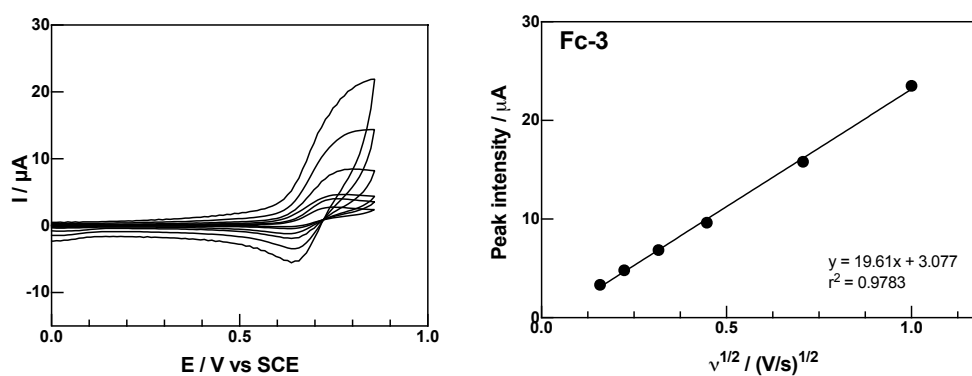

**Figure S9. Left)** CVs of compound **Fc-3** ( $c = 0.25 \text{ mM}$ ) in a solution of  $0.1\text{M TBABF}_4 \text{ CH}_2\text{Cl}_2/\text{ACN}$  (1/1) at various scan rate from  $25 \text{ mV}\cdot\text{s}^{-1}$  to  $1 \text{ V}\cdot\text{s}^{-1}$ ; **Right)** Plot of the peak current versus the square root of the scan rate. Right) WE = GC electrode, RE = SCE.

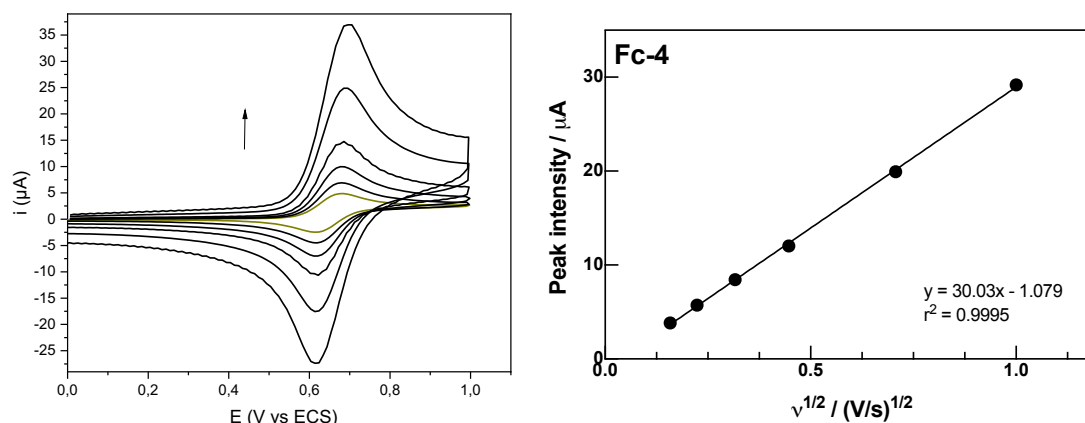

**Figure S10. Left)** CVs of compound **Fc-4** ( $c = 0.25 \text{ mM}$ ) in a solution of  $0.1\text{M TBAPF}_6 \text{ CH}_2\text{Cl}_2/\text{ACN}$  (1/1) at various scan rate from  $25 \text{ mV}\cdot\text{s}^{-1}$  to  $1 \text{ V}\cdot\text{s}^{-1}$ ; **Right)** Plot of the peak current versus the square root of the scan rate. WE = GC electrode, RE = SCE.

## B. Fc derivatives in solution in presence of various LB

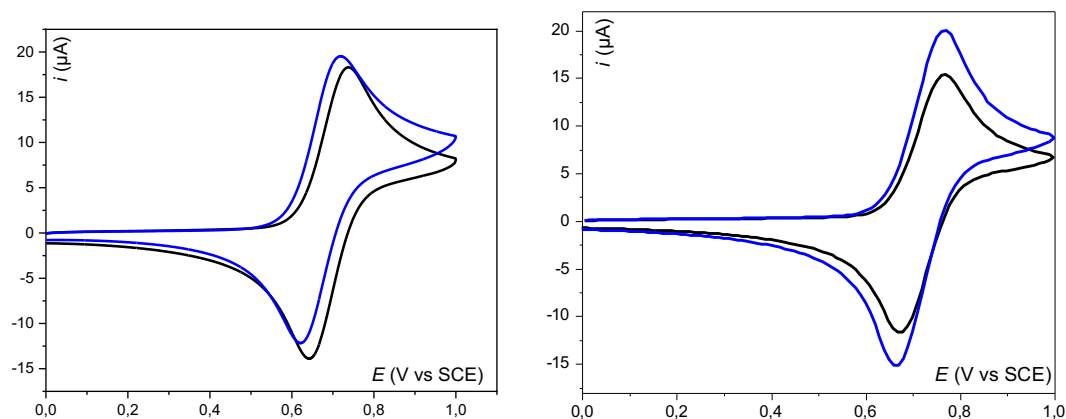

**Figure S11.** CV of compound **Fc-1** ( $C = 0.5 \text{ mM}$ ) in a solution of  $0.1\text{M TBAPF}_6 / \text{dichloromethane}$ ,  $v = 100 \text{ mV/s}$ , WE = GC electrode, RE = SCE. **left**) without (black trace) and with 5 equiv of TBACl (blue trace); **right**) without (black trace) and with 5 equiv of TBAOTf (blue trace).

## C. Fc derivatives in solution in presence of the substrates

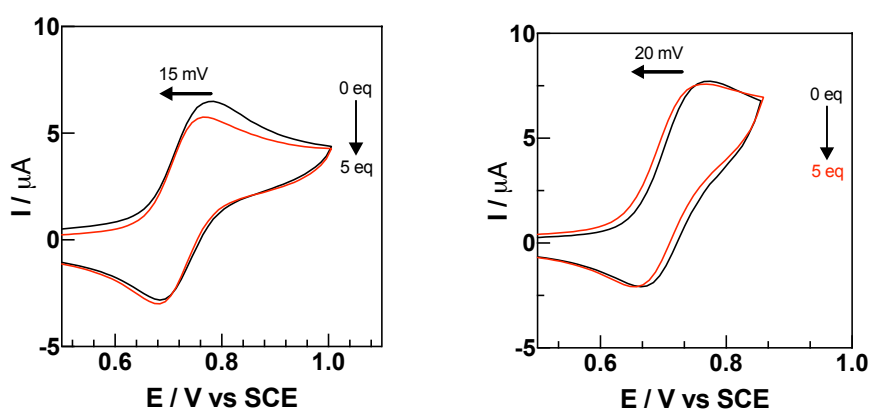

**Figure S12.** CV of compound **Fc-1** ( $c = 0.25 \text{ mM}$ ) in a solution of  $0.1\text{M TBABF}_4 / 1:1 \text{ dichloromethane/acetonitrile}$ ,  $v = 100 \text{ mV/s}$ , WE = GC electrode, RE = SCE). **left**) without (black trace) and with 5 equiv of benzylhydri chloride (red trace); **right**) without (black trace) and with 5 equiv of benzylhydri bromide (red trace).

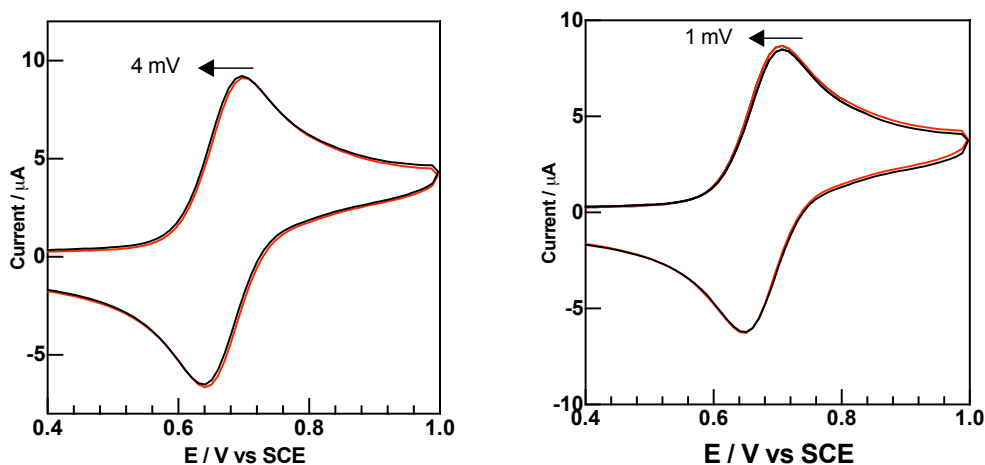

**Figure S13.** CV of compound **Fc-2** ( $c = 0.25$  mM) in a solution of  $0.1\text{M TBABF}_4 / 1:1$  dichloromethane/acetonitrile,  $v = 100$  mV/s, WE = GC electrode, RE = SCE). **left**) without (black trace) and with 5 equiv of benzyhydril chloride (red trace); **right**) without (black trace) and with 5 equiv of benzyhydril bromide (red trace).

## 6. Activation of XB donor for Freidel-Craft Alkylation

### A. General Procedure for stoichiometric condition

A solution of XB donor (8.33 mM in solvent) was added to  $\text{NOBF}_4$  (2.2 eq) under argon and store for 5 minutes. Then, this solution was transfer to an NMR tube containing a solution of benzyhydril halide (0.005 mmol), 1,3,5-trimethoxymethane (0.005 mmol), *t*-amyl methyl ether (0.005 mmol) and cesium carbonate (0.010 mmol) in solvent (0.1 mL). The resulting mixture was shaken manually for 5 min before being monitored by  $^1\text{H}$  NMR. The  $^1\text{H}$  NMR yields were calculated using the following formula:

yield (%) =  $100\% \cdot [v(\text{product}) / v(\text{standard})] \cdot n \cdot N$ , where  $[v(\text{product}) / v(\text{standard})]$  is the integral ratio of the corresponding  $^1\text{H}$  NMR peaks,  $n$  is the ratio of the standard to starting material (in mol) and  $N +$  is the ratio of the number of protons of the standard to the number of protons of the starting material.

### B. General Procedure for catalysis

A solution of XB donor ( $x$  mM in  $500 \mu\text{L } 1:1 \text{ CD}_2\text{Cl}_2/\text{CD}_3\text{CN}$ ) was added to  $\text{NOBF}_4$  (2.2 eq) under argon and store for 5 minutes. Then, this solution was transfer to an NMR tube containing a solution of benzyhydril chloride (0.005 mmol), 1,3,5-trimethoxymethane (0.005 mmol), *t*-amyl methyl ether (0.005 mmol) and cesium carbonate (0.010 mmol) in solvent (0.1 mL). The resulting mixture was shaken manually for 5 min before being monitored by  $^1\text{H}$  NMR. The  $^1\text{H}$  NMR yields were calculated using the following formula:

yield (%) =  $100\% \cdot [v(\text{product}) / v(\text{standard})] \cdot n \cdot N$ , where  $[v(\text{product}) / v(\text{standard})]$  is the integral ratio of the corresponding  $^1\text{H}$  NMR peaks,  $n$  is the ratio of the standard to starting material (in mol) and  $N$  is the ratio of the number of protons of the standard to the number of protons of the starting material.

### C. Procedure for substrate concentration

A solution of XB donor (8.33 mM in  $0.5 \text{ mL } 1:1 \text{ CD}_2\text{Cl}_2/\text{CD}_3\text{CN}$ ) was added to  $\text{NOBF}_4$  (2.2 eq) under argon and store for 5 minutes. Then, this solution was transfer to an NMR tube containing a solution of benzyhydril chloride ( $x$  mmol), 1,3,5-trimethoxymethane (0.005 mmol), *t*-amyl methyl ether (0.005 mmol) and cesium carbonate (0.010 mmol) in solvent (0.1 mL). The resulting mixture was shaken manually for 5 min before being monitored by  $^1\text{H}$  NMR. The  $^1\text{H}$  NMR yields were calculated using the following formula:

yield (%) =  $100\% \cdot [v(\text{product}) / v(\text{standard})] \cdot n \cdot N$ , where  $[v(\text{product}) / v(\text{standard})]$  is the integral ratio of the corresponding  $^1\text{H}$  NMR peaks,  $n$  is the ratio of the standard to starting material (in mol) and  $N$  is the ratio of the number of protons of the standard to the number of protons of the starting material.

## 7. Reproducibility experiment

The reproducibility of the experiments with BHC and the freshly generated XB donor (**Fc-2**)<sup>3+</sup> in a 1:1 mixture of  $\text{CD}_2\text{Cl}_2/\text{CD}_3\text{CN}$  (**Figure S14**). The experiments were repeated 4 times and similar results were obtained with a standard deviation of solely 1.25 % for the average final yield of 63.25 % (**Table S5**). However, with regards to the kinetic curves, significant differences in the initial reaction rate  $v_{ini}$  could be identified. The values were compared relative to the experiment that exhibited the highest exponential growth (**Figure S14**, black curve). By determining the initial slope within the 0-2 h time interval and with the fastest kinetic curve normalized  $v_{rel}$ , the lowest  $v_{rel}$  was calculated to be 0.75. Despite the differences in  $v_{ini}$  the reaction was regarded to be reproducible, due to the overall high similarity of the yields after 24 h and overall the curve's progression.

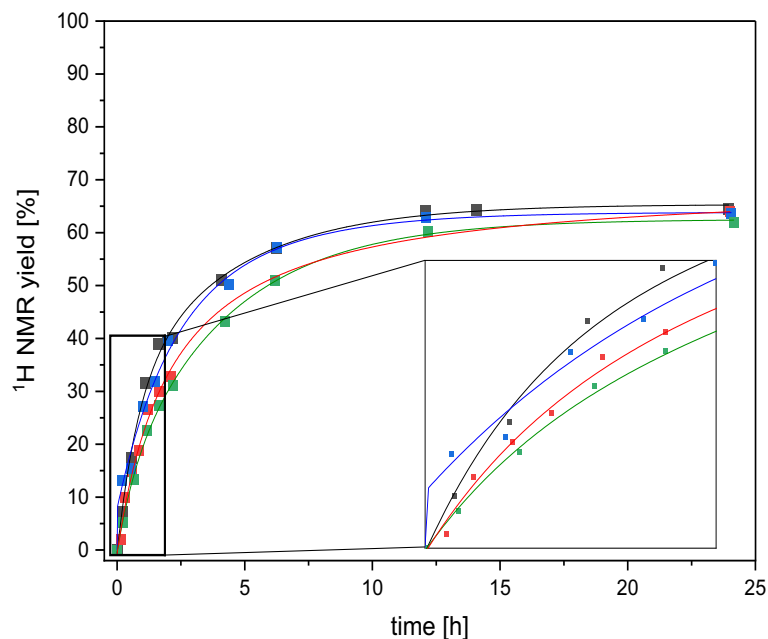

**Figure S14.** Time-yield plot of the TMPMDB between BHC and TMB using  $(\text{I-Fc})_2\text{Py}^{2+}(\text{BF}_4)_2$  as activator species, obtained in 1:1  $\text{CD}_2\text{Cl}_2/\text{CD}_3\text{CN}$  over 4 separate experiments.

**Table S5.** Friedel-Crafts reaction yields after 24 h of 4 experiments at the same reaction conditions. (stoichiometric reaction cond.:  $(\text{Fc-2})^{3+}$ , BHC, TMB,  $\text{Cs}_2\text{CO}_3$  in  $\text{CD}_2\text{Cl}_2/\text{CD}_3\text{CN}$ ;  $c = 8.33 \text{ mM}$ ; rt). [a] = in % determined via  $^1\text{H}$  NMR spectroscopy; [b] = mol/s.

| Entry   | NMR Yield after 24 h <sup>[a]</sup> | $v_{ini}$ <sup>[b]</sup> | $v_{rel}$ |
|---------|-------------------------------------|--------------------------|-----------|
| 1       | 64.5                                | $2.80 \cdot 10^{-10}$    | 1.00      |
| 2       | 64.1                                | $2.60 \cdot 10^{-10}$    | 0.93      |
| 3       | 63.7                                | $2.31 \cdot 10^{-10}$    | 0.82      |
| 4       | 62.0                                | $2.10 \cdot 10^{-10}$    | 0.75      |
| average | $63.25 \pm 1.25$                    | $2.45 \cdot 10^{-10}$    | -         |

## 8. UV-vis analysis in the presence of substrate

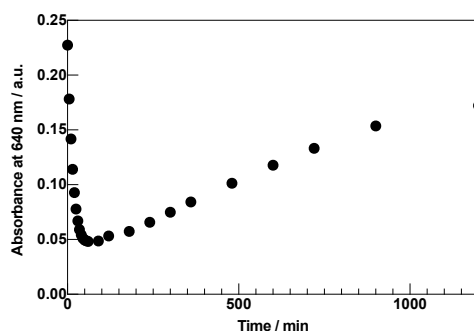

**Figure S15.** UV-vis absorbance at 640 nm over time of the reaction mixture at 10 mol%  $\text{Fc-2}^{3+}$  in the presence of 8.33 mM **2** and **4**.

## 9. NMR spectra

### A. NMR spectra of Fc-1

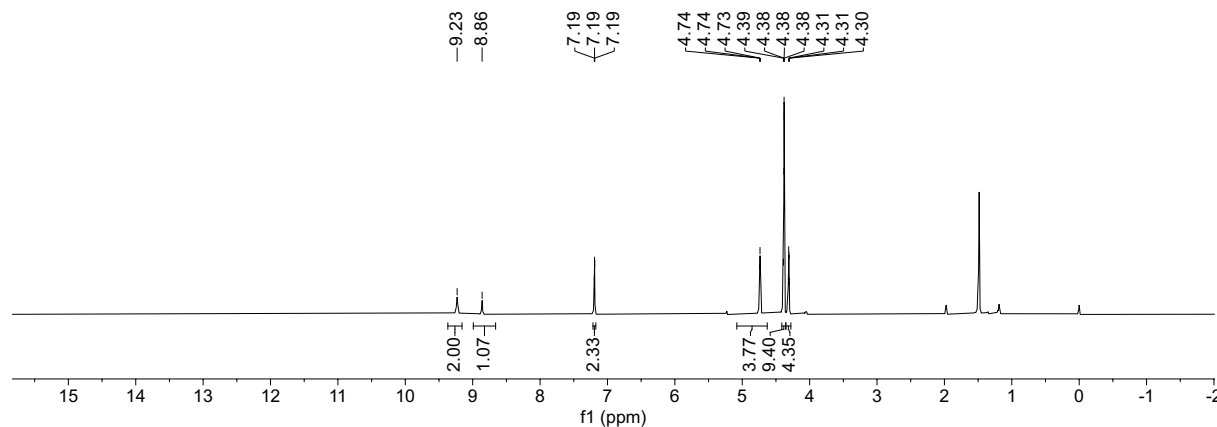

Figure S16.  $^1\text{H}$  NMR spectrum of **Fc-1** in  $\text{CDCl}_3$  at 298K (400 MHz)

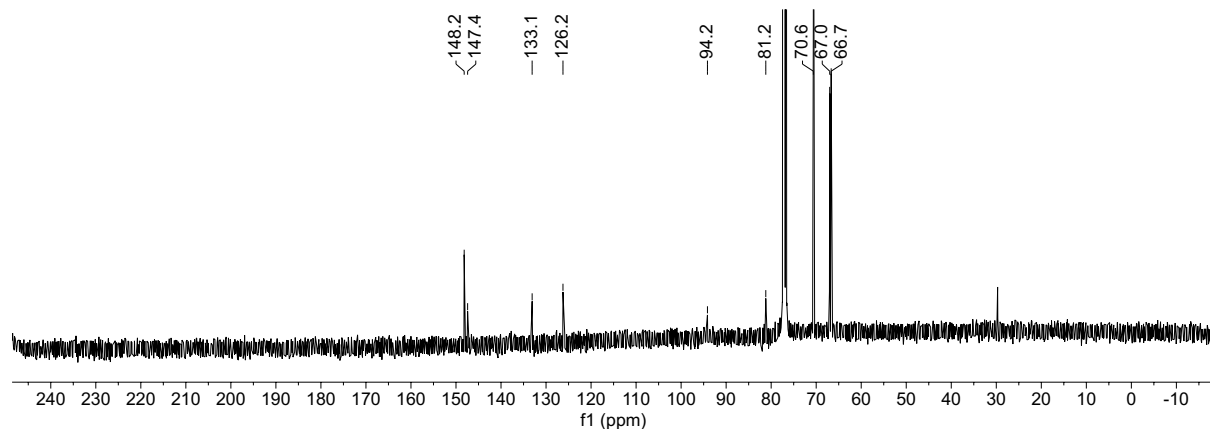

Figure S17.  $^{13}\text{C}$  NMR spectrum of **Fc-1** in DMSO at 298K (101 MHz)

### B. NMR spectra of (Fc-2)OTf

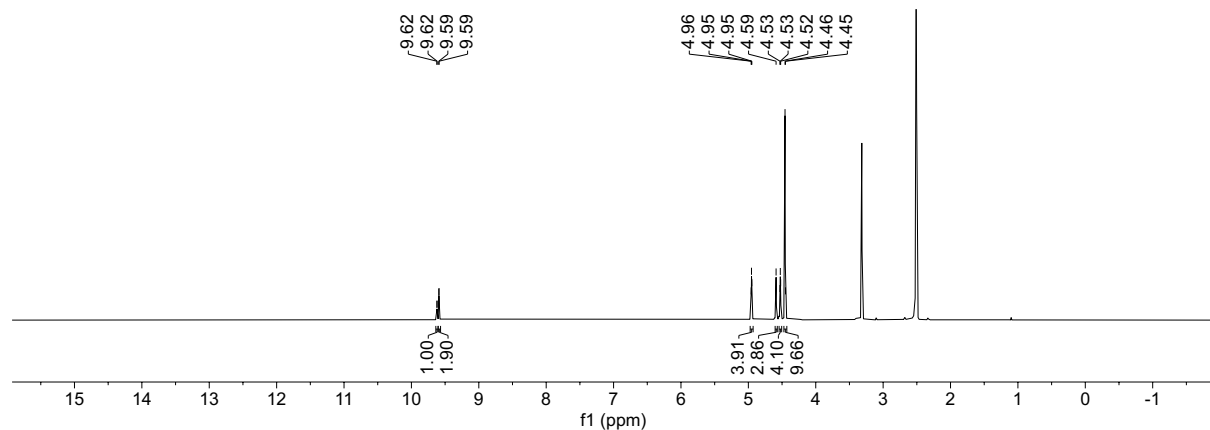

Figure S18.  $^1\text{H}$  NMR spectrum of **(Fc-2)OTf** in DMSO at 298K (400 MHz)

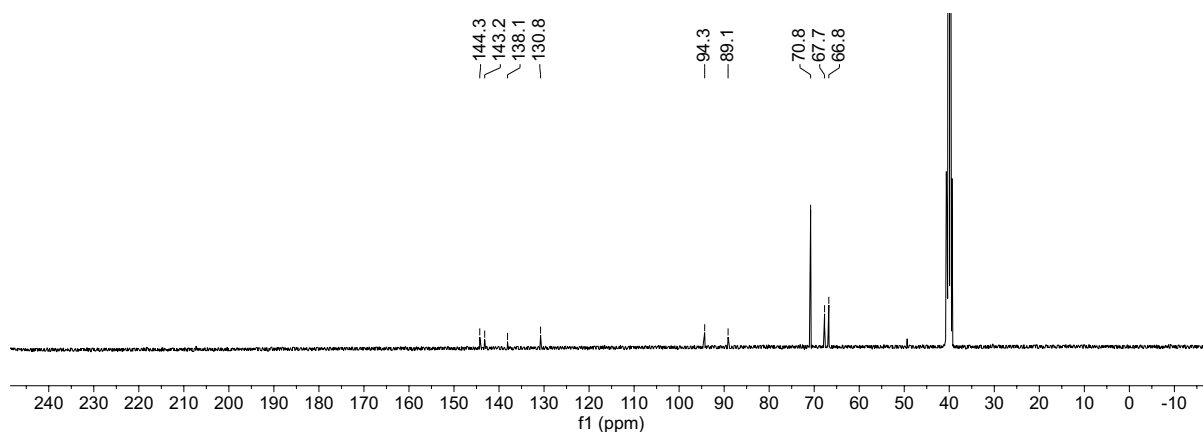

Figure S19.  $^{13}\text{C}$  NMR spectrum of (Fc-2)OTf in DMSO at 298K (400 MHz)

### C. NMR spectra of Fc-3

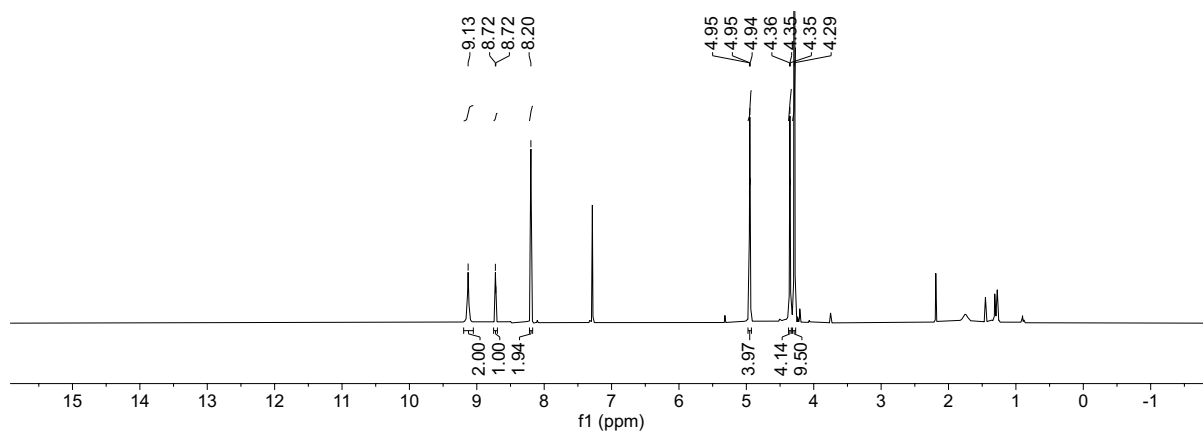

Figure S20.  $^1\text{H}$  NMR spectrum of Fc-3 in  $\text{CDCl}_3$  at 298K (400 MHz)

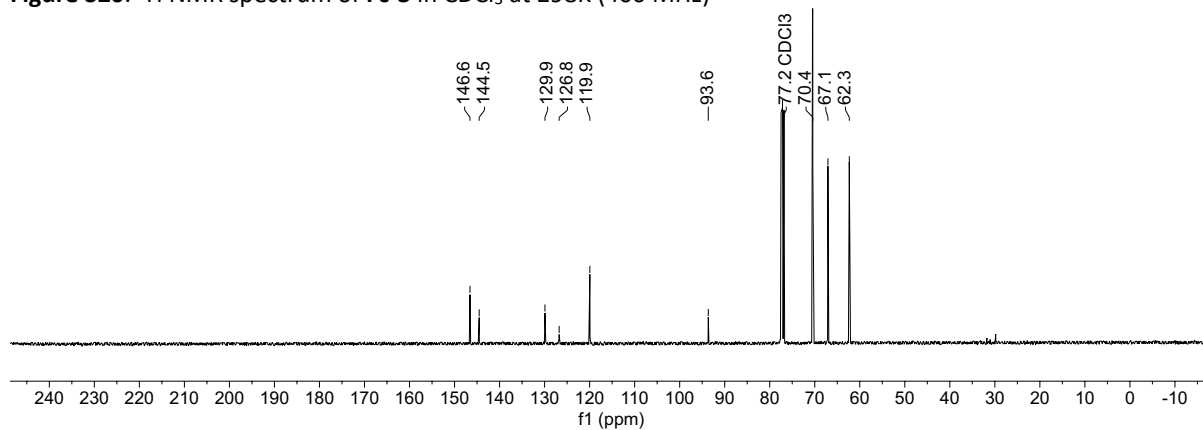

Figure S21.  $^{13}\text{C}$  NMR spectrum of Fc-3 in  $\text{CDCl}_3$  at 298K (400 MHz)

## D. NMR spectra of (Fc-4)OTf

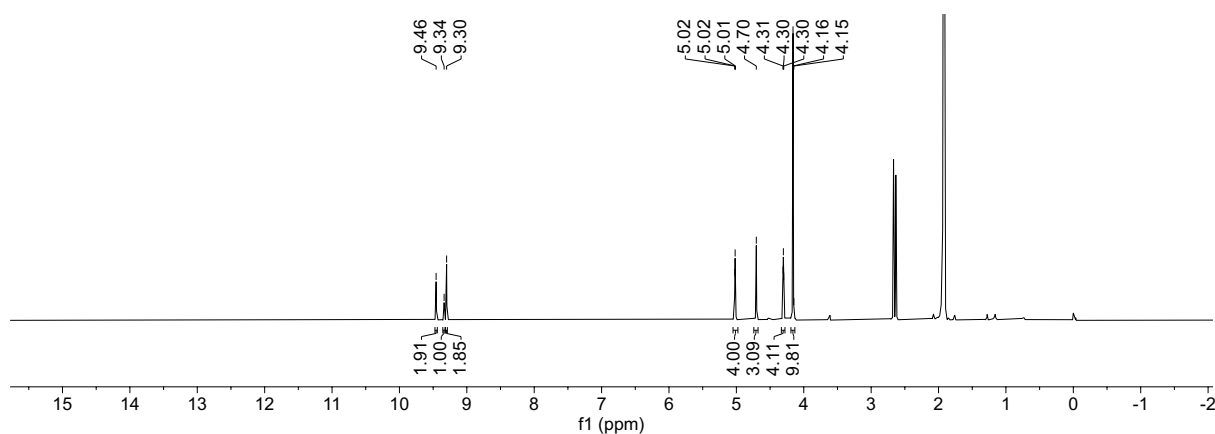

Figure S22. <sup>1</sup>H NMR spectrum of (Fc-4)OTf in acetone at 298K (400 MHz)

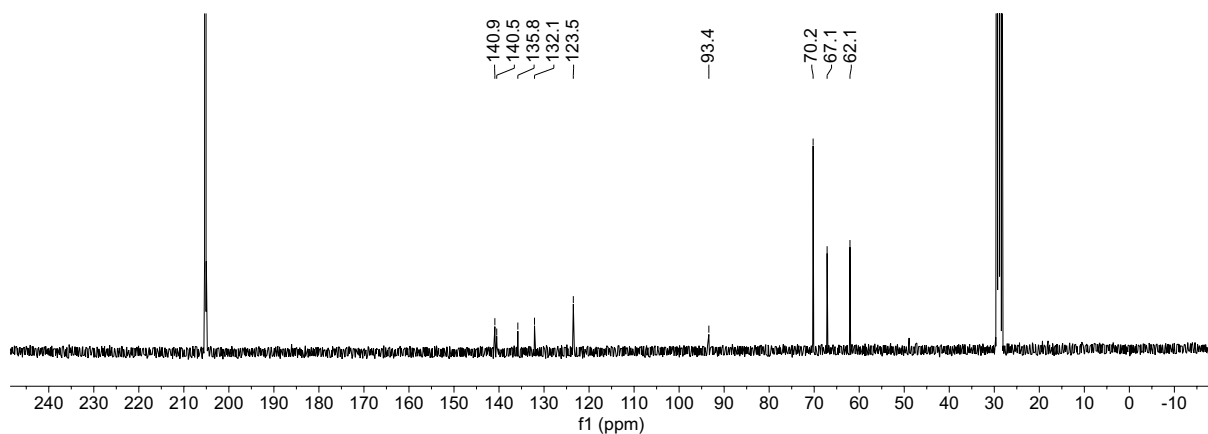

Figure S23. <sup>13</sup>C NMR spectrum of (Fc-4)OTf in acetone at 298K (400 MHz)

## E. NMR spectra of (Fc-2)I

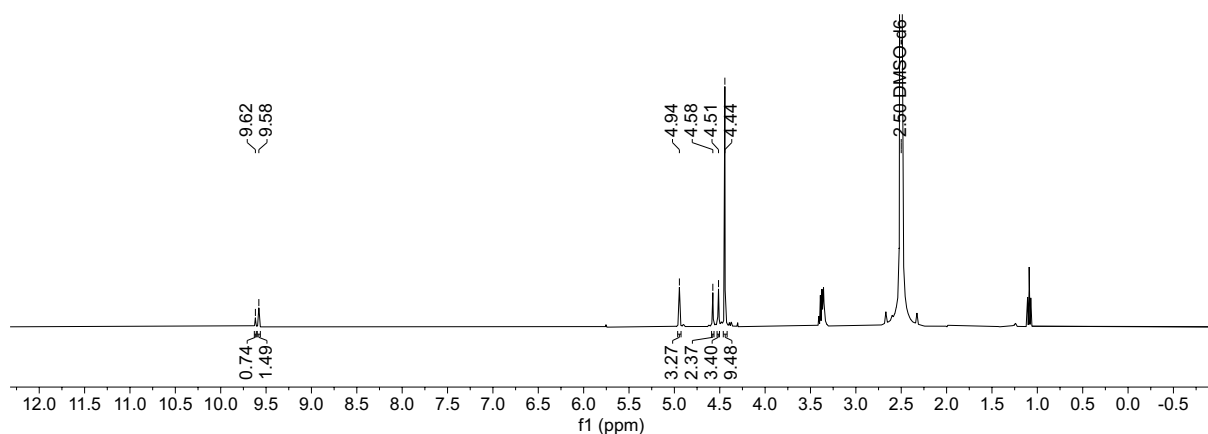

Figure S24. <sup>1</sup>H NMR spectrum of (Fc-2)I in DMSO at 298K (400 MHz)

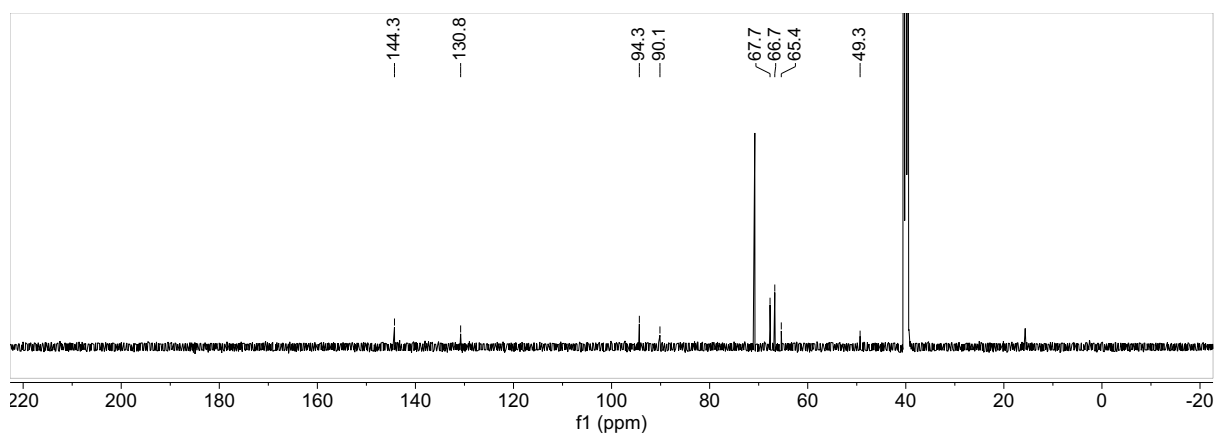

Figure S25.  $^{13}\text{C}$  NMR spectrum of (Fc-2)I in DMSO at 298K (400 MHz)

## 10. NMR spectra of catalysis experiment

### A. Reactivity with BHB – stoichiometric condition

1. Table 2 entry 1 – Fc-1 $^{2+}$  in  $\text{CD}_2\text{Cl}_2$  2 h

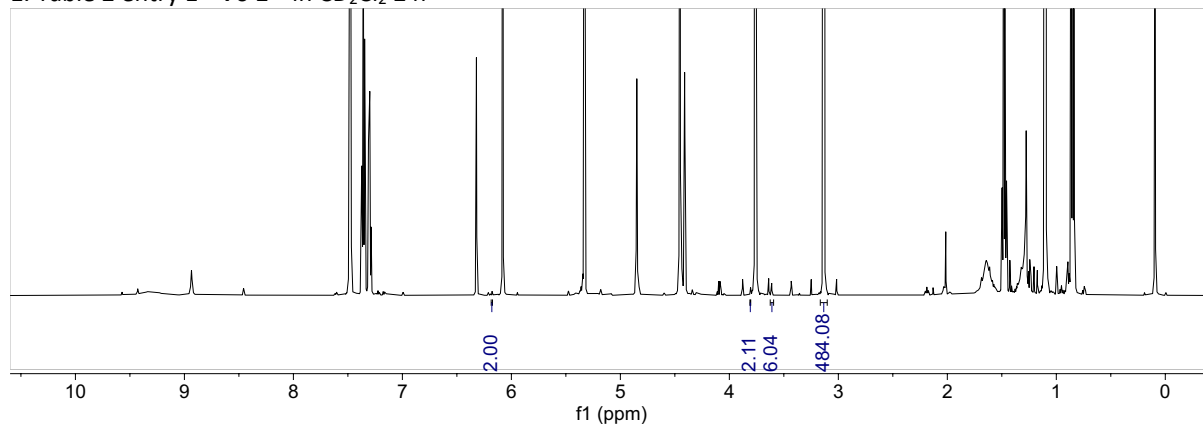

2. Table 2 entry 1 – Fc-1 $^{2+}$  in  $\text{CD}_2\text{Cl}_2$  24 h

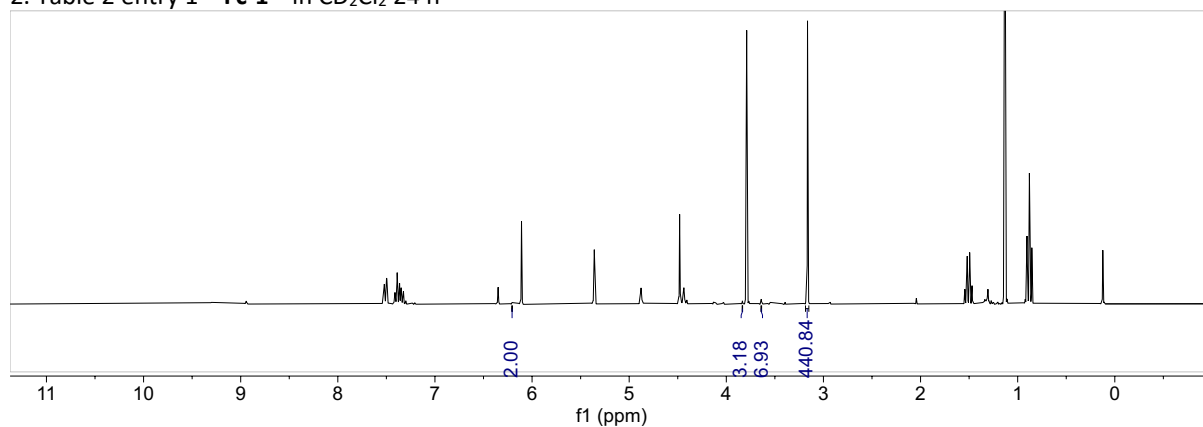

3. Table 2 entry 2 – **Fc-1<sup>2+</sup>** in 1:1 CD<sub>2</sub>Cl<sub>2</sub>/CD<sub>3</sub>CN 2 h

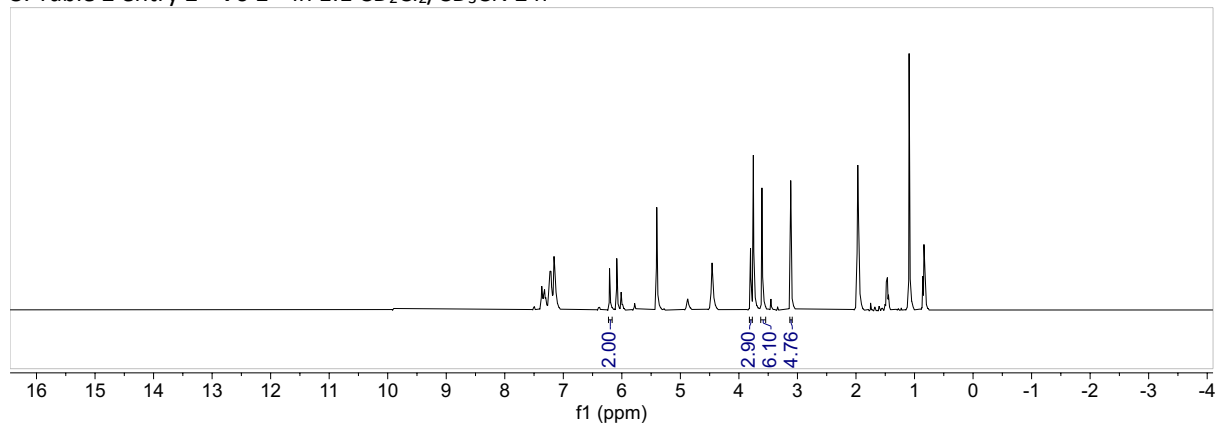

4. Table 2 entry 2 – **Fc-1<sup>2+</sup>** in 1:1 CD<sub>2</sub>Cl<sub>2</sub>/CD<sub>3</sub>CN 24 h

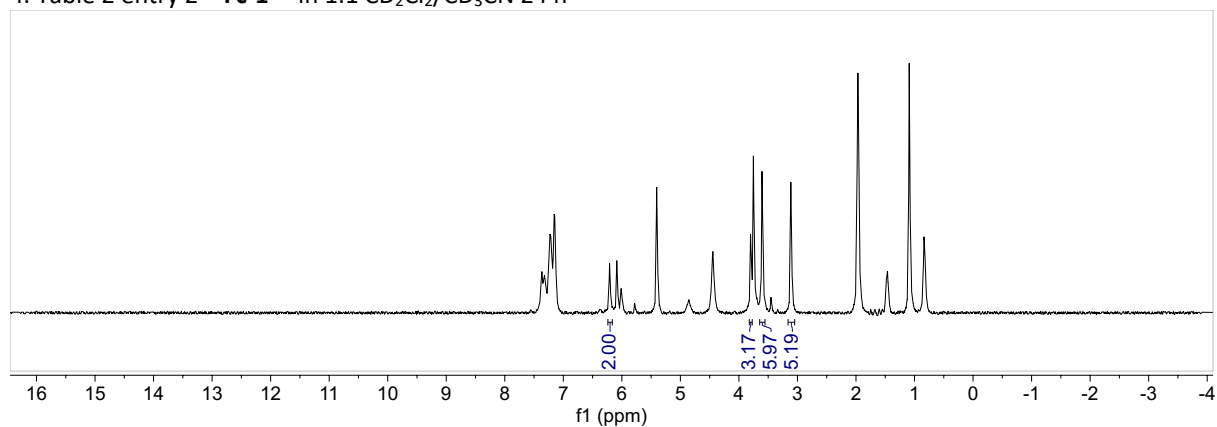

5. Table 2 entry 3 – **Fc-1<sup>2+</sup>** in CD<sub>3</sub>CN 2 h

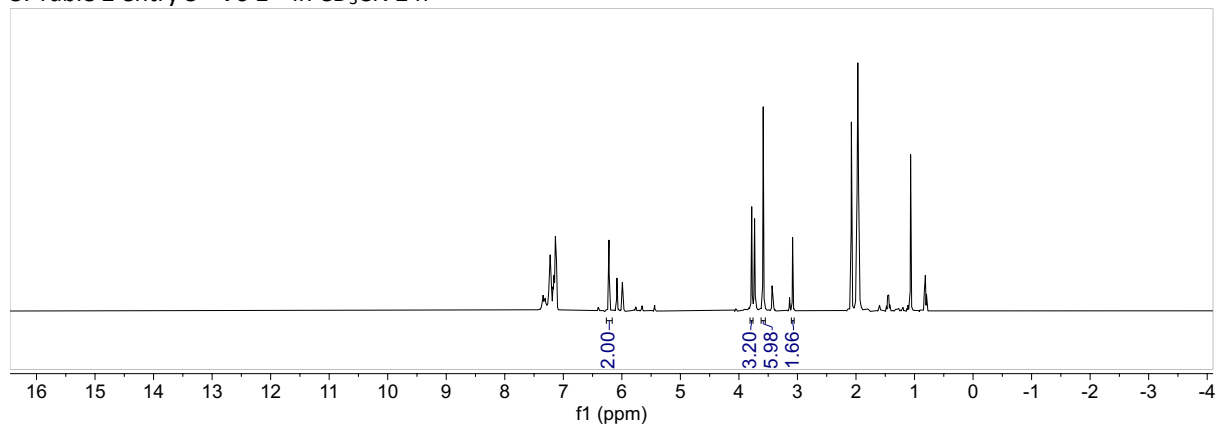

6. Table 2 entry 3 – **Fc-1<sup>2+</sup>** in CD<sub>3</sub>CN 24 h

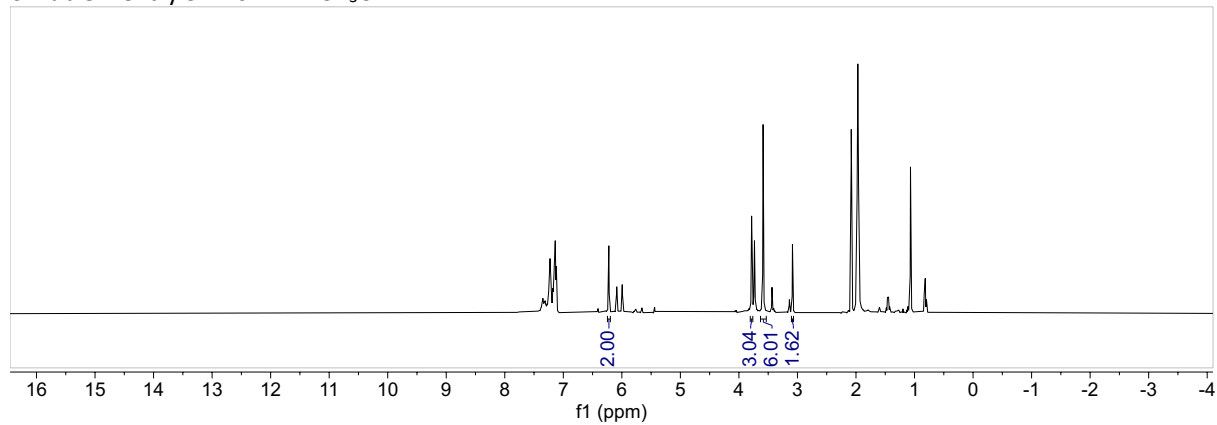

7. Table 2 entry 4 – (Fc-2)<sup>3+</sup> 2h

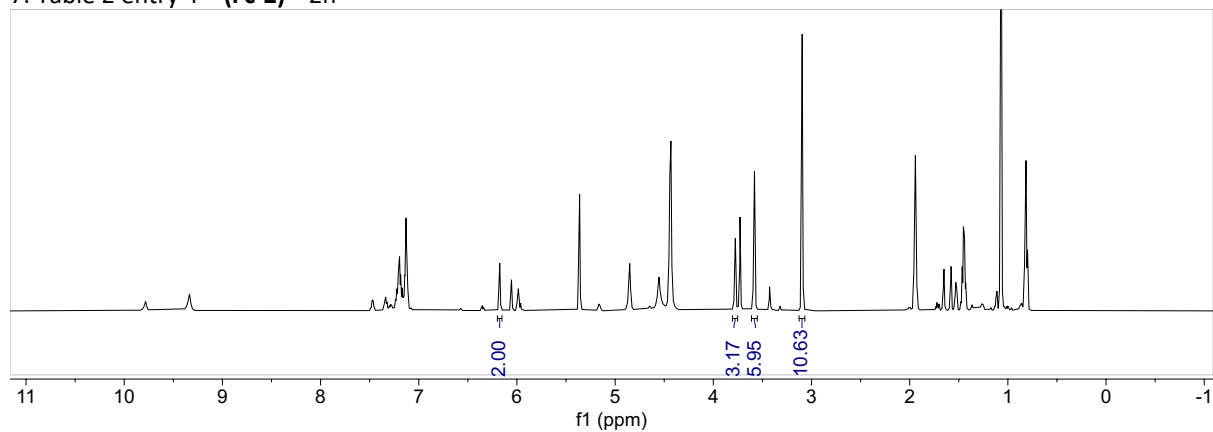

8. Table 2 entry 4 – (Fc-2)<sup>3+</sup> 24h

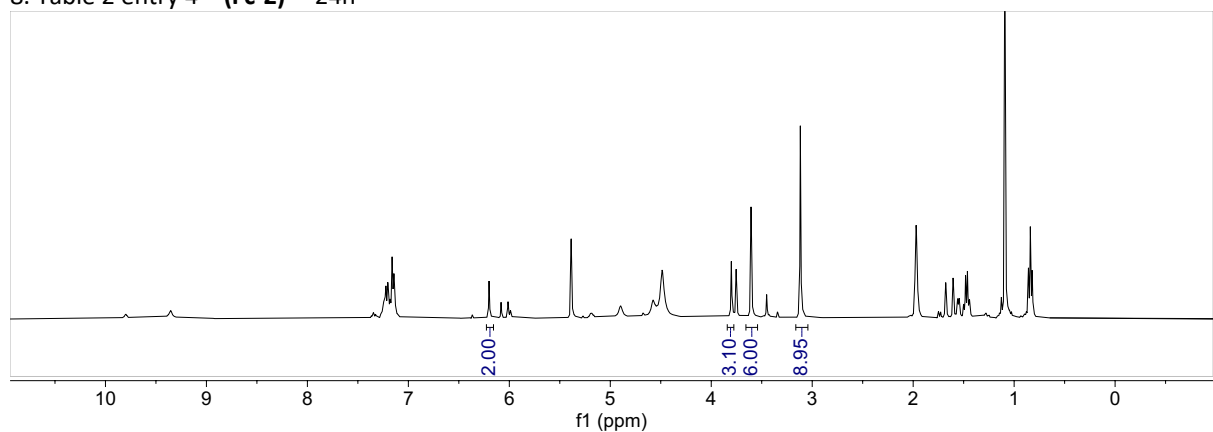

## B. Reactivity with BHC – stoichiometric condition

1. Table 3 entry 1 – Fc-1<sup>2+</sup> 2h

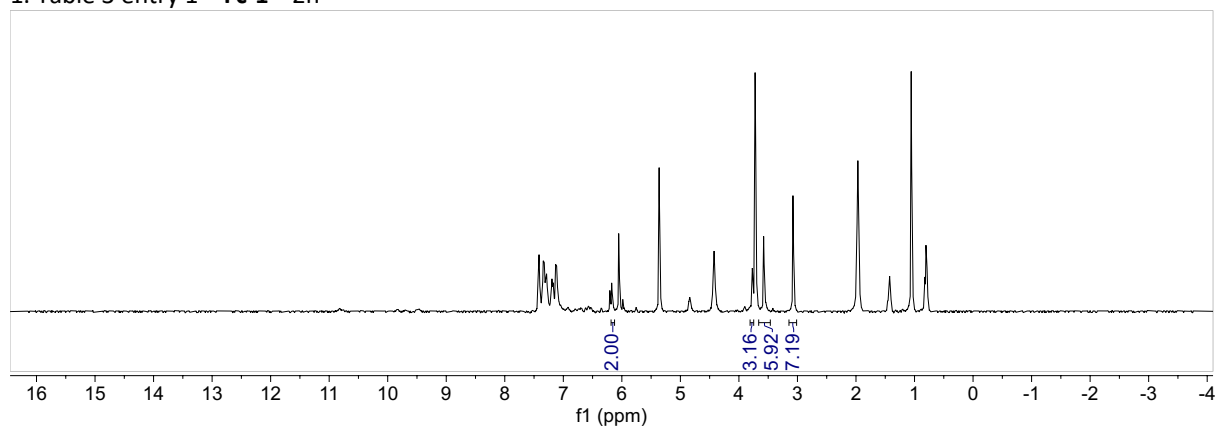

2. Table 3 entry 1 – **Fc-1**<sup>2+</sup> 24h

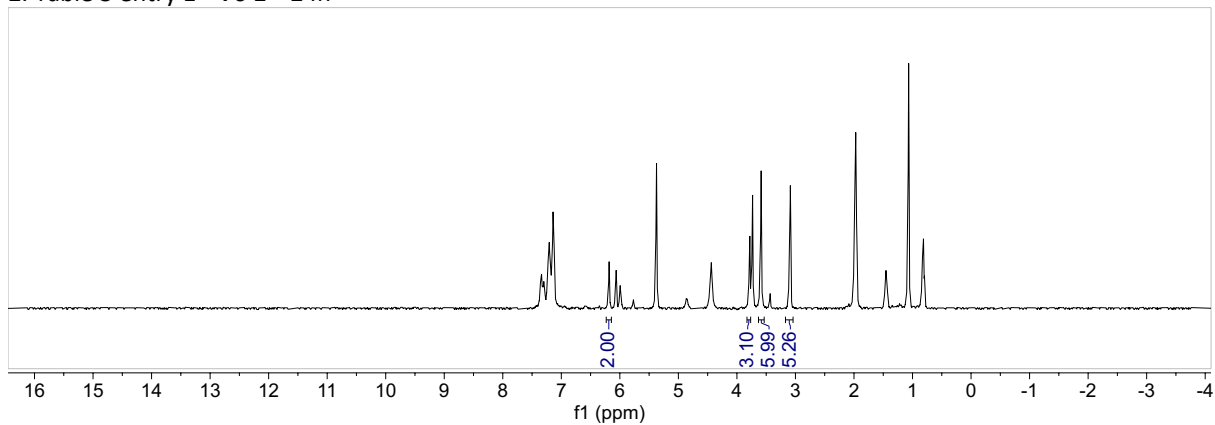

3. Table 3 entry 2 – (**Fc-2**)<sup>3+</sup> 2h

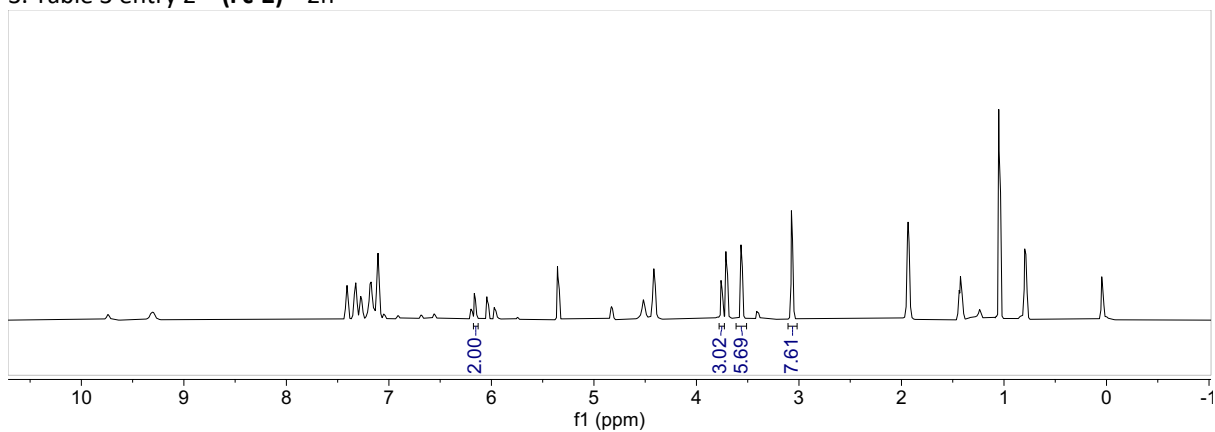

4. Table 3 entry 2 – (**Fc-2**)<sup>3+</sup> 24h

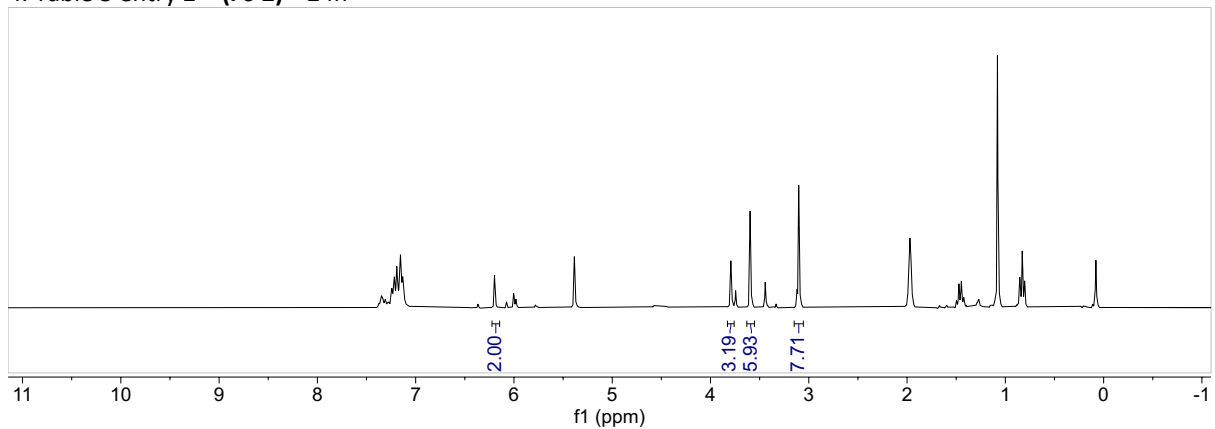

## C. Reactivity with BHC – catalytic condition

1. (Fc-2)<sup>3+</sup> 100 mol% 0-24h

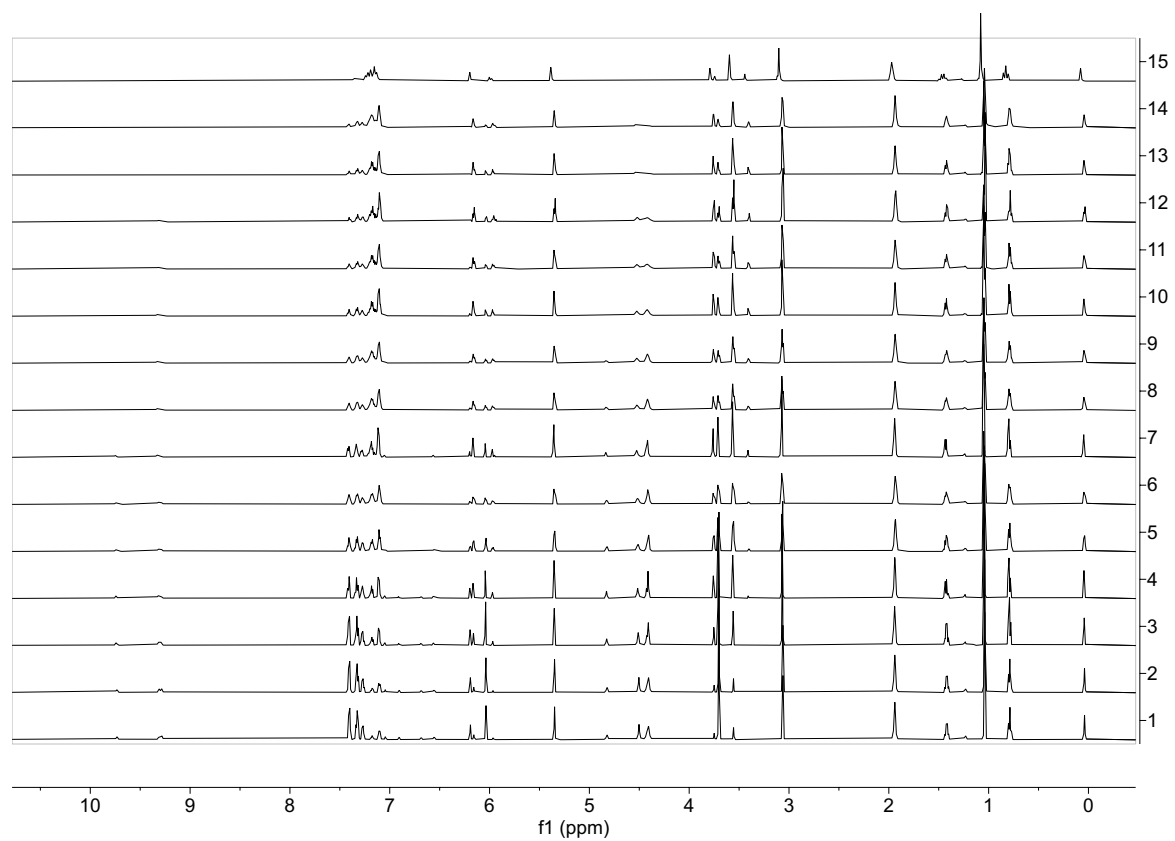

2. (Fc-2)<sup>3+</sup> 50 mol% 0-24h

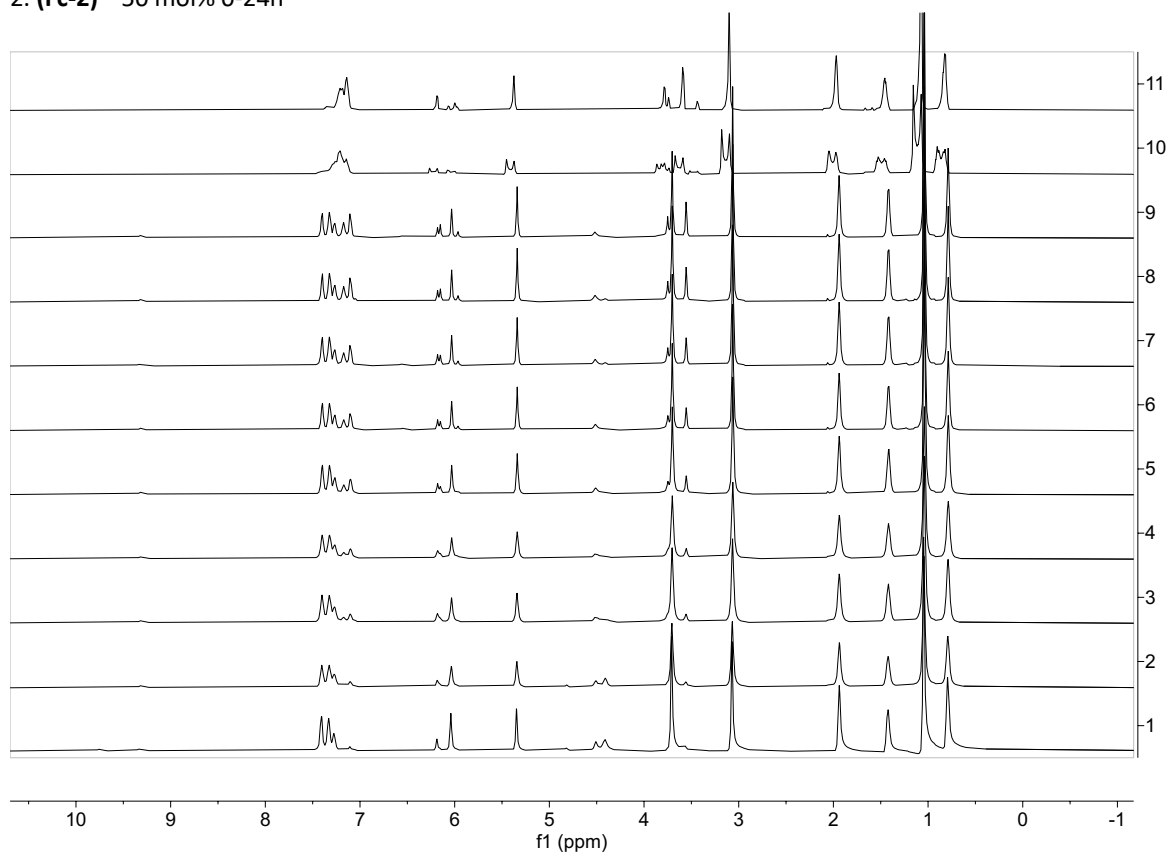

3. (Fc-2)<sup>3+</sup> 50 mol% 24h

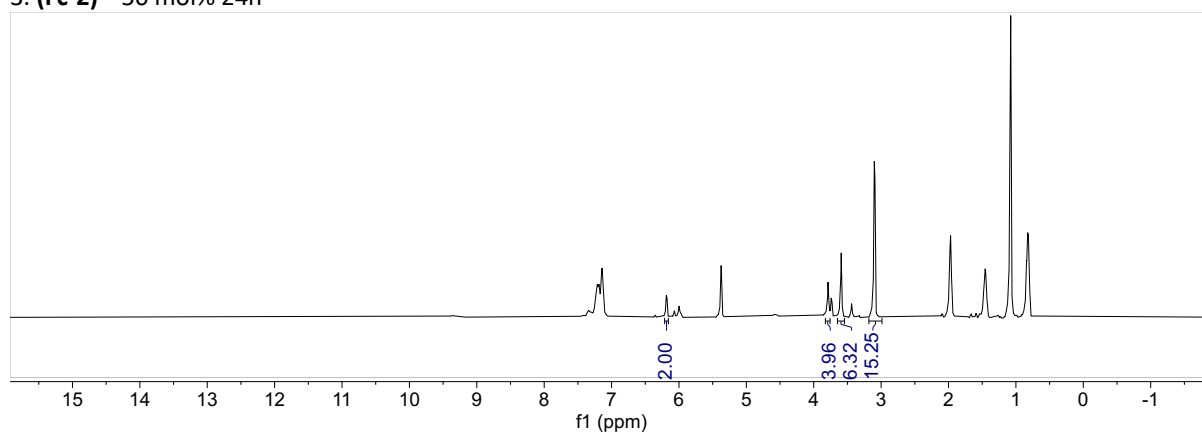

4. (Fc-2)<sup>3+</sup> 25 mol% 0-24h

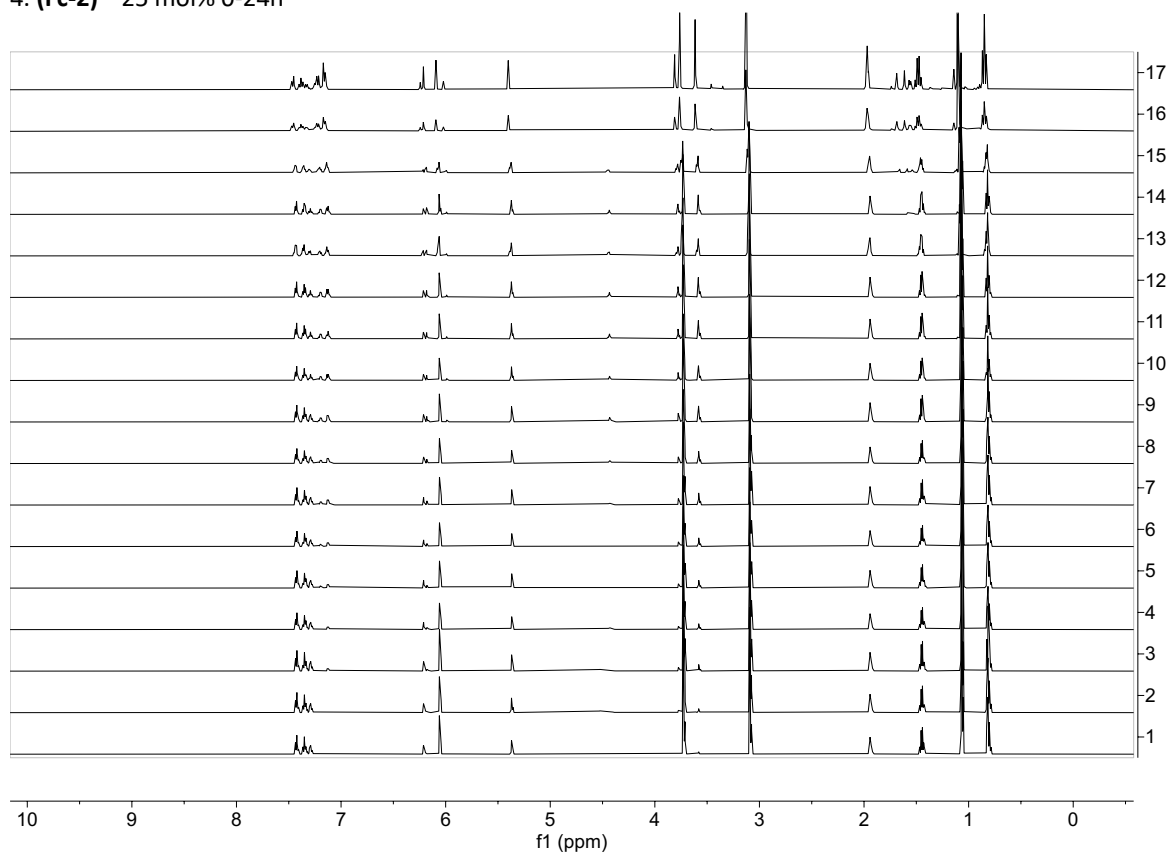

5. (Fc-2)<sup>3+</sup> 25 mol% 24h

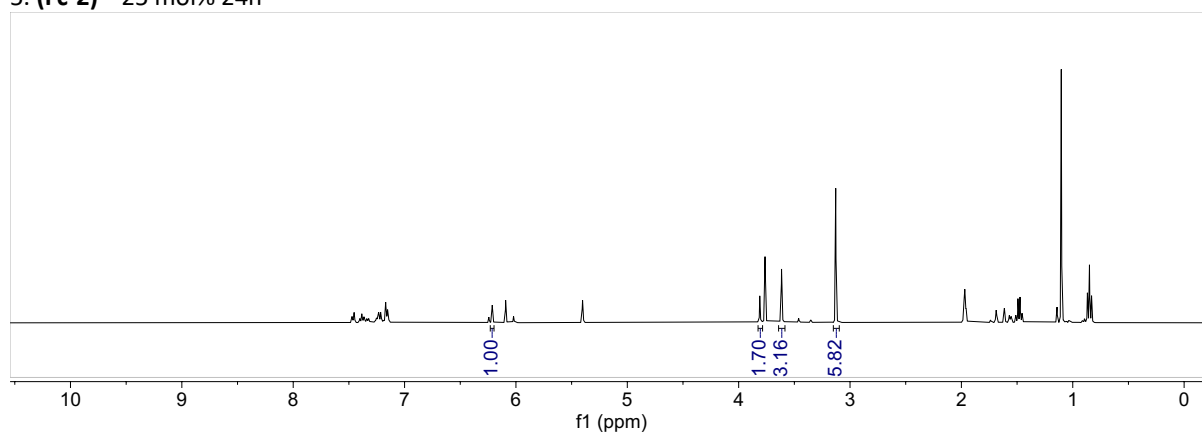

6. (Fc-2)<sup>3+</sup> 10 mol% 0-24h

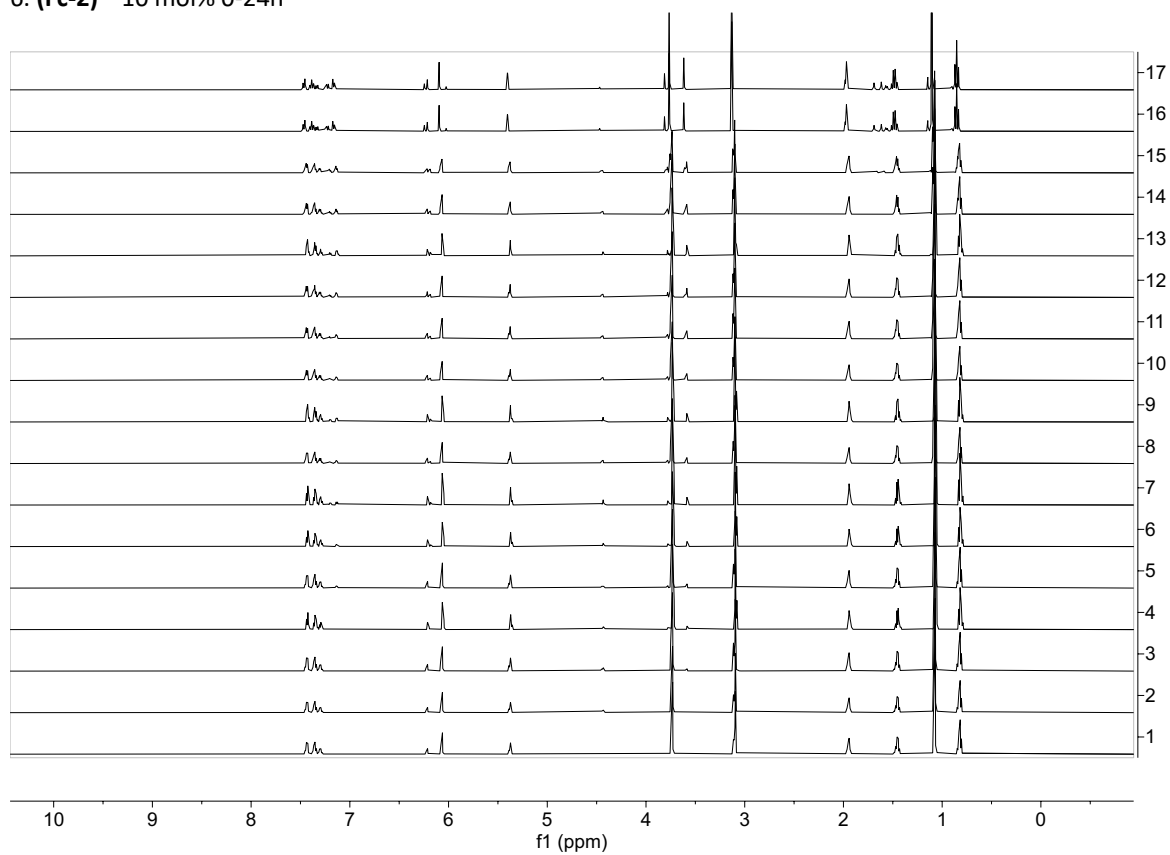

7. (Fc-2)<sup>3+</sup> 10 mol% 24h

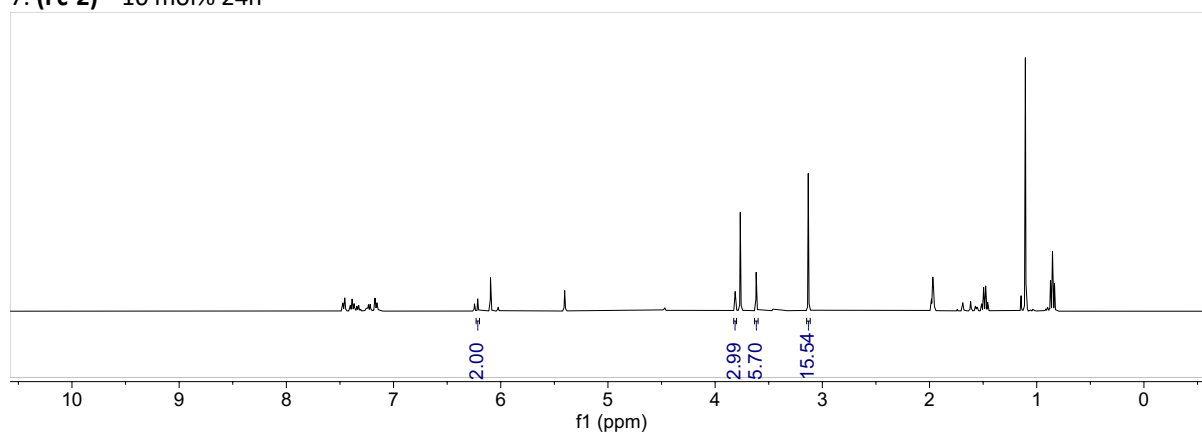

8. (Fc-2)<sup>3+</sup> 2.5 mol% 0-24h

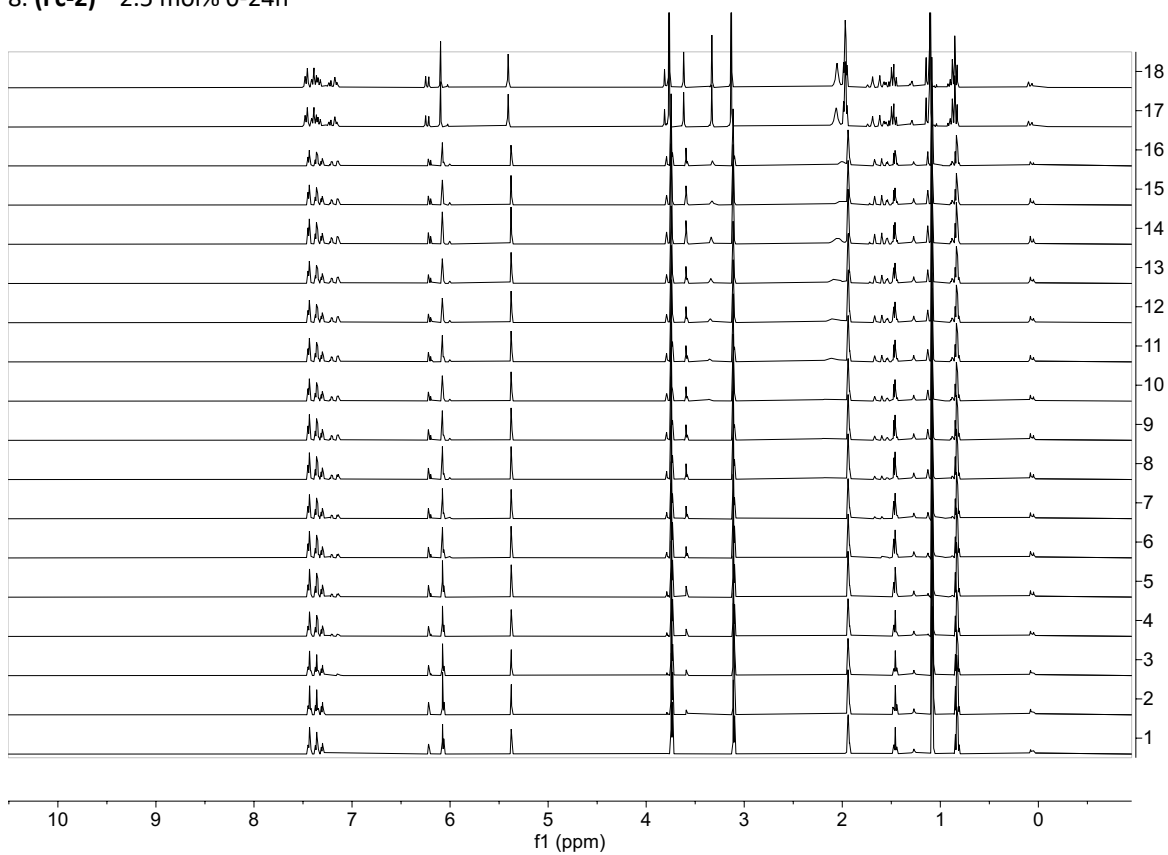

9. (Fc-2)<sup>3+</sup> 2.5 mol% 24h

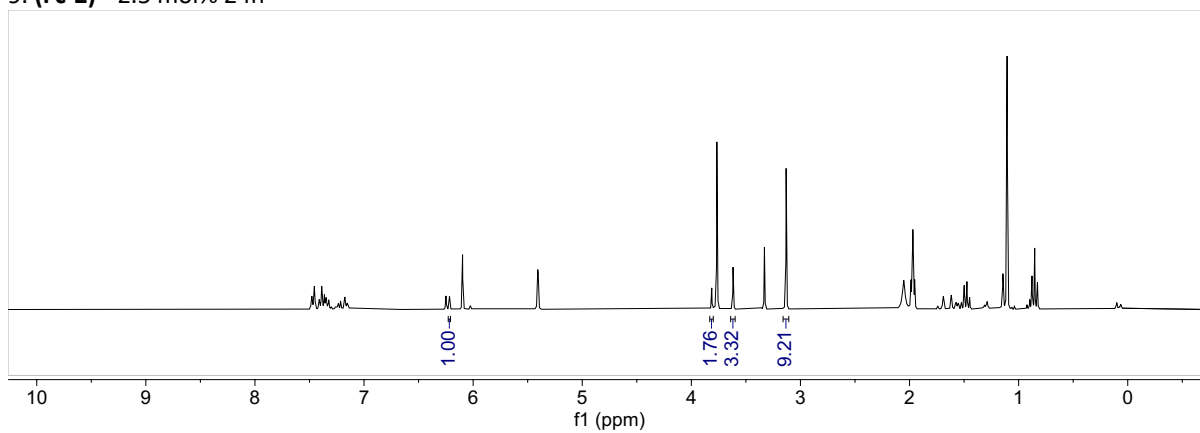

## D. Reactivity with BHC – catalyst/substrate concentration

1.  $(\text{Fc-2})^{3+}$  8.33 mM / BHC 33.32 mM 0-24h

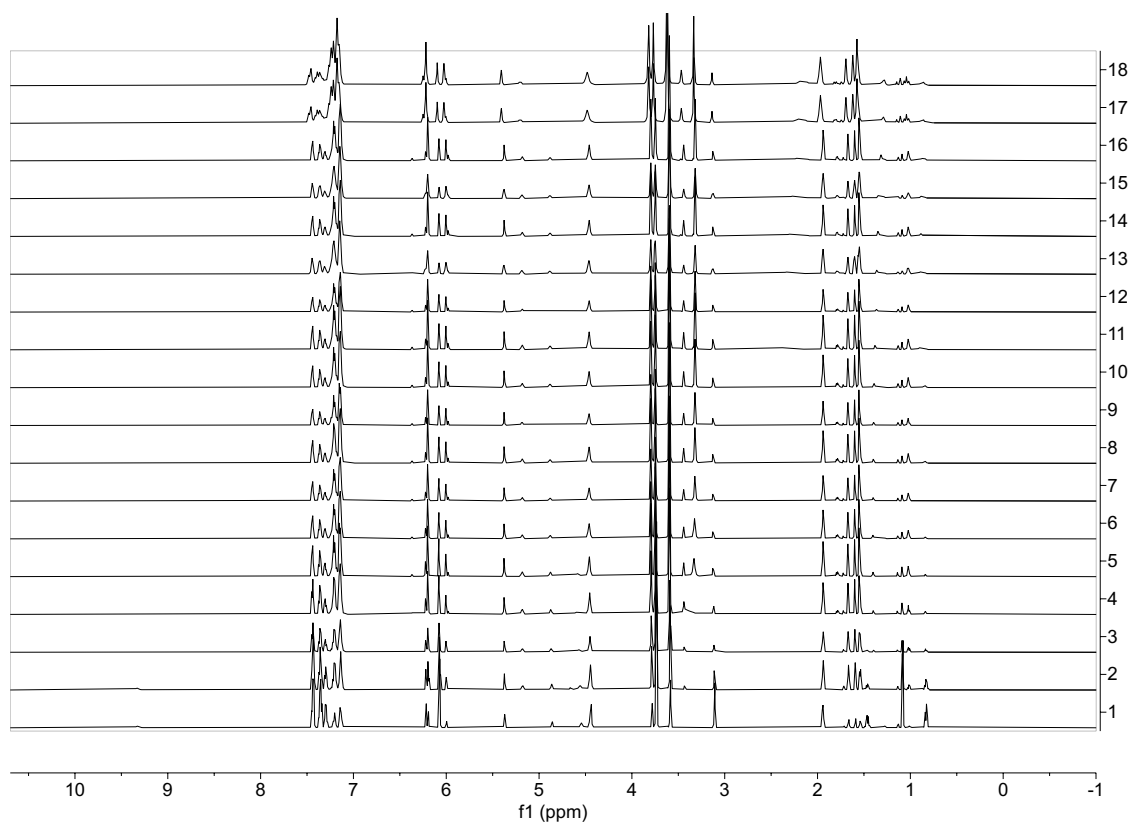

2.  $(\text{Fc-2})^{3+}$  8.33 mM / BHC 33.32 mM 0-24h

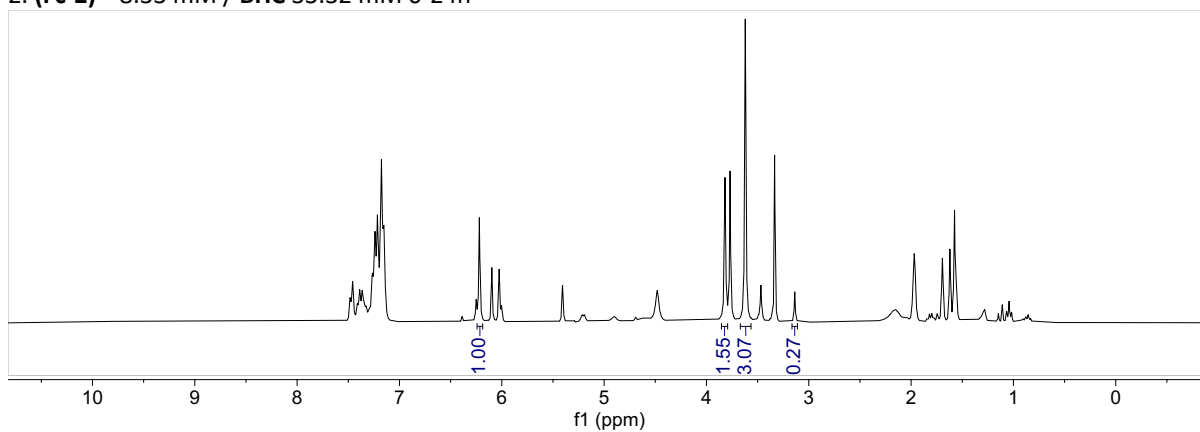

## 11. Cartesian coordinates of the optimized structures

**<sup>1</sup>Fc-1<sup>2+</sup>**

Charge: 2, Multiplicity: 1, Nlmag: 0

E = -4623.96276439 ht

G = -4623.61603196 ht

|    |             |             |             |
|----|-------------|-------------|-------------|
| H  | 1.39767000  | -0.11737700 | -0.13915900 |
| C  | 1.92088700  | 0.82676200  | -0.07290000 |
| C  | 2.27018200  | 1.34672800  | 1.16908900  |
| C  | 2.26946000  | 1.51945200  | -1.22868100 |
| C  | 2.95711600  | 2.73126100  | -1.07218100 |
| C  | 2.96868500  | 2.56015100  | 1.19180800  |
| H  | 3.24603200  | 3.29718700  | -1.95118400 |
| H  | 3.26243300  | 2.98943100  | 2.14412400  |
| N  | 2.40821700  | 0.23685800  | 4.52691800  |
| N  | 2.81995300  | 0.87883800  | 3.49910000  |
| C  | 1.97570200  | 0.69782200  | 2.43804900  |
| C  | 0.93432100  | -0.10771400 | 2.86656900  |
| N  | 1.23292200  | -0.38636400 | 4.17089000  |
| C  | 1.98706200  | 1.05882500  | -2.57992600 |
| C  | 1.71184100  | -0.18789500 | -3.12140100 |
| N  | 1.63179900  | 0.03659500  | -4.46770900 |
| N  | 1.83996900  | 1.36889000  | -4.73735400 |
| N  | 2.03726900  | 1.95192600  | -3.61601300 |
| N  | 3.29641200  | 3.23702900  | 0.10270800  |
| C  | 0.57156900  | -1.13104700 | 5.14621000  |
| C  | -0.80775300 | -1.07439700 | 5.47481500  |
| C  | 1.24803600  | -1.93970500 | 6.10159300  |
| C  | -1.00104600 | -1.90984400 | 6.60302400  |
| H  | -1.56097700 | -0.49904700 | 4.96144300  |
| C  | 0.26226300  | -2.44397600 | 6.99134600  |
| H  | 2.30809800  | -2.13546100 | 6.11462200  |
| H  | -1.94514700 | -2.08507800 | 7.09443700  |
| H  | 0.44766800  | -3.11247300 | 7.81700500  |
| C  | 1.40742200  | -0.82228600 | -5.54312100 |
| C  | 2.11804200  | -0.73790200 | -6.77234300 |
| C  | 0.35988200  | -1.77029900 | -5.67207900 |
| C  | 1.54097500  | -1.69265100 | -7.65145100 |
| H  | 2.94921700  | -0.08011100 | -6.96958900 |
| C  | 0.45991100  | -2.32628000 | -6.97118000 |
| H  | -0.37054500 | -2.01556700 | -4.91809300 |
| H  | 1.86948400  | -1.89516500 | -8.65847900 |
| H  | -0.19239900 | -3.08282700 | -7.37820800 |
| Fe | 0.14145100  | -0.30095800 | -7.16245900 |
| Fe | 0.31222800  | -0.41603300 | 7.12751900  |
| C  | -1.49875800 | -0.02860500 | -8.39649100 |
| C  | -0.34385700 | 0.62618700  | -8.91486300 |
| C  | -1.79564000 | 0.53313400  | -7.13008900 |
| H  | -2.03481400 | -0.83824600 | -8.86749900 |
| C  | 0.07319600  | 1.59128000  | -7.95631300 |
| H  | 0.13450100  | 0.42221900  | -9.85975600 |
| C  | -0.83499000 | 1.53338800  | -6.86483400 |
| H  | -2.59580900 | 0.22901700  | -6.47412600 |
| H  | 0.92888400  | 2.24318500  | -8.03322000 |
| H  | -0.74775800 | 2.10181400  | -5.95105800 |
| C  | -0.44302000 | 0.51935800  | 8.81043500  |

|   |             |             |             |
|---|-------------|-------------|-------------|
| C | -0.34508000 | 1.48036700  | 7.77363400  |
| C | 0.85840400  | -0.01055800 | 9.05073400  |
| H | -1.35321800 | 0.21793200  | 9.30573400  |
| C | 1.00792300  | 1.55080300  | 7.37606700  |
| H | -1.16379300 | 2.03685200  | 7.34559700  |
| C | 1.75789700  | 0.62572200  | 8.15052400  |
| H | 1.11543300  | -0.76427500 | 9.77814300  |
| H | 1.39815000  | 2.14261800  | 6.56163900  |
| H | 2.81573900  | 0.43632900  | 8.06012600  |
| I | 1.61213600  | -2.07905000 | -2.30600200 |
| I | -0.73453800 | -0.82773800 | 1.89628900  |

### **<sup>3</sup>Fe-1<sup>2+</sup>**

Charge: 2, Multiplicity: 3, NImag: 0

E = -4623.96895200 ht

G = -4623.61009250 ht

|    |             |             |             |
|----|-------------|-------------|-------------|
| H  | 0.58240400  | -0.52448500 | 0.00000000  |
| C  | -0.26340700 | 0.15128800  | -0.00000000 |
| C  | -0.81305000 | 0.58662200  | 1.20181500  |
| C  | -0.81305000 | 0.58662200  | -1.20181500 |
| C  | -1.88484300 | 1.48133600  | -1.13555000 |
| C  | -1.88484300 | 1.48133600  | 1.13555000  |
| H  | -2.31979600 | 1.88486900  | -2.04464600 |
| H  | -2.31979600 | 1.88486900  | 2.04464600  |
| N  | 1.36030900  | -0.58503500 | 3.74652900  |
| N  | 1.07265000  | -0.18926400 | 2.56279700  |
| C  | -0.25172200 | 0.13651200  | 2.46658200  |
| C  | -0.83199100 | -0.07557600 | 3.70623600  |
| N  | 0.19818900  | -0.52483600 | 4.48542000  |
| C  | -0.25172200 | 0.13651200  | -2.46658200 |
| C  | -0.83199100 | -0.07557600 | -3.70623600 |
| N  | 0.19818900  | -0.52483600 | -4.48542000 |
| N  | 1.36030900  | -0.58503500 | -3.74652900 |
| N  | 1.07265000  | -0.18926400 | -2.56279700 |
| N  | -2.40483600 | 1.92303900  | -0.00000000 |
| C  | 0.25658900  | -0.89214800 | 5.82651500  |
| C  | -0.37534600 | -0.24227500 | 6.91889600  |
| C  | 1.12948700  | -1.89940200 | 6.32372200  |
| C  | 0.05285400  | -0.89970300 | 8.09906400  |
| H  | -1.05380200 | 0.59300100  | 6.85678700  |
| C  | 0.97950000  | -1.92042000 | 7.73586400  |
| H  | 1.75946800  | -2.53164800 | 5.71942100  |
| H  | -0.25744400 | -0.64645400 | 9.10059100  |
| H  | 1.48585400  | -2.59411500 | 8.40866800  |
| C  | 0.25658900  | -0.89214800 | -5.82651500 |
| C  | 1.12948700  | -1.89940200 | -6.32372200 |
| C  | -0.37534600 | -0.24227500 | -6.91889600 |
| C  | 0.97950000  | -1.92042000 | -7.73586400 |
| H  | 1.75946800  | -2.53164800 | -5.71942100 |
| C  | 0.05285400  | -0.89970300 | -8.09906400 |
| H  | -1.05380200 | 0.59300100  | -6.85678700 |
| H  | 1.48585400  | -2.59411500 | -8.40866800 |
| H  | -0.25744400 | -0.64645400 | -9.10059100 |
| Fe | 1.70398000  | -0.10805400 | -7.17031500 |
| Fe | 1.70398000  | -0.10805400 | 7.17031500  |
| C  | 2.68984400  | 1.08607200  | -8.54267000 |

|   |             |             |             |
|---|-------------|-------------|-------------|
| C | 3.54140600  | 0.05733800  | -8.04362500 |
| C | 2.28950800  | 1.89730300  | -7.45184100 |
| H | 2.37396500  | 1.20842300  | -9.56728000 |
| C | 3.65924300  | 0.23713300  | -6.63706700 |
| H | 4.00799300  | -0.72206200 | -8.62503200 |
| C | 2.89297400  | 1.37987000  | -6.28452600 |
| H | 1.61997000  | 2.74133800  | -7.50164400 |
| H | 4.21756400  | -0.38554000 | -5.95624000 |
| H | 2.73135100  | 1.73700800  | -5.27823300 |
| C | 2.68984400  | 1.08607200  | 8.54267000  |
| C | 2.28950800  | 1.89730300  | 7.45184100  |
| C | 3.54140600  | 0.05733800  | 8.04362500  |
| H | 2.37396500  | 1.20842300  | 9.56728000  |
| C | 2.89297400  | 1.37987000  | 6.28452600  |
| H | 1.61997000  | 2.74133800  | 7.50164400  |
| C | 3.65924300  | 0.23713300  | 6.63706700  |
| H | 4.00799300  | -0.72206200 | 8.62503200  |
| H | 2.73135100  | 1.73700800  | 5.27823300  |
| H | 4.21756400  | -0.38554000 | 5.95624000  |
| I | -2.79957300 | -0.03584300 | -4.31597400 |
| I | -2.79957300 | -0.03584300 | 4.31597400  |

### <sup>1</sup>Fc-1

Charge: 0, Multiplicity: 1, NImag: 0

E = -4624.49729479 ht

G = -4624.13514320 ht

|   |             |             |             |
|---|-------------|-------------|-------------|
| H | 0.00001300  | 0.81310600  | -0.02693300 |
| C | 0.00001200  | 1.88549900  | -0.18296900 |
| C | -1.20278500 | 2.58386100  | -0.24559800 |
| C | 1.20281500  | 2.58385100  | -0.24556800 |
| C | 1.13499700  | 3.97506000  | -0.36946700 |
| C | -1.13494600 | 3.97507000  | -0.36950200 |
| H | 2.05720200  | 4.54564500  | -0.41049500 |
| H | -2.05714300 | 4.54566300  | -0.41056200 |
| N | -4.61660200 | 1.90359200  | 0.43625200  |
| N | -3.54785500 | 2.63373200  | 0.43876500  |
| C | -2.51190700 | 1.95765300  | -0.12928800 |
| C | -2.99391400 | 0.72102900  | -0.52243700 |
| N | -4.30275400 | 0.71974300  | -0.14748200 |
| C | 2.51192000  | 1.95761500  | -0.12922800 |
| C | 2.99392900  | 0.72102900  | -0.52249000 |
| N | 4.30274000  | 0.71967000  | -0.14744100 |
| N | 4.61657000  | 1.90343900  | 0.43646500  |
| N | 3.54783900  | 2.63360600  | 0.43898200  |
| N | 0.00002900  | 4.65802000  | -0.43070500 |
| C | -5.29506900 | -0.26502000 | -0.33884400 |
| C | -6.58009400 | -0.01746200 | -0.90299600 |
| C | -5.18387500 | -1.65267400 | -0.02581100 |
| C | -7.26236100 | -1.26191000 | -0.94929300 |
| H | -6.94566500 | 0.94739200  | -1.21539200 |
| C | -6.40536600 | -2.26572800 | -0.41631300 |
| H | -4.33022500 | -2.13349900 | 0.42435100  |
| H | -8.26838400 | -1.41435600 | -1.30645200 |
| H | -6.64801800 | -3.31009700 | -0.30182000 |
| C | 5.29503600  | -0.26511400 | -0.33881200 |
| C | 5.18383100  | -1.65274900 | -0.02571000 |

|    |             |             |             |
|----|-------------|-------------|-------------|
| C  | 6.58004700  | -0.01759900 | -0.90300300 |
| C  | 6.40531100  | -2.26583200 | -0.41619600 |
| H  | 4.33018600  | -2.13354500 | 0.42449200  |
| C  | 7.26230200  | -1.26205100 | -0.94924300 |
| H  | 6.94562200  | 0.94723400  | -1.21545500 |
| H  | 6.64795600  | -3.31019600 | -0.30165300 |
| H  | 8.26831700  | -1.41452600 | -1.30641300 |
| Fe | 6.73187300  | -0.80838600 | 0.95060000  |
| Fe | -6.73190200 | -0.80835600 | 0.95056000  |
| C  | 7.73513100  | -1.64780900 | 2.49908300  |
| C  | 6.45853100  | -1.18675200 | 2.92524200  |
| C  | 8.45316800  | -0.53360800 | 1.98237800  |
| H  | 8.08758500  | -2.66644100 | 2.53863100  |
| C  | 6.38692400  | 0.20932800  | 2.66931100  |
| H  | 5.67187800  | -1.79591300 | 3.34183200  |
| C  | 7.61828700  | 0.61381400  | 2.08649500  |
| H  | 9.44495000  | -0.56102000 | 1.55938200  |
| H  | 5.53425300  | 0.84811300  | 2.83576600  |
| H  | 7.85348700  | 1.60975400  | 1.74635200  |
| C  | -7.73495100 | -1.64797400 | 2.49906100  |
| C  | -8.45321500 | -0.53389800 | 1.98238700  |
| C  | -6.45841800 | -1.18668000 | 2.92518500  |
| H  | -8.08721200 | -2.66667300 | 2.53861200  |
| C  | -7.61854100 | 0.61368200  | 2.08648300  |
| H  | -9.44500700 | -0.56149200 | 1.55942600  |
| C  | -6.38708000 | 0.20942300  | 2.66925900  |
| H  | -5.67163300 | -1.79569400 | 3.34174100  |
| H  | -7.85396500 | 1.60958300  | 1.74637900  |
| H  | -5.53452200 | 0.84836300  | 2.83569500  |
| I  | 2.12796900  | -0.78467100 | -1.63273000 |
| I  | -2.12791200 | -0.78482000 | -1.63244400 |

### **<sup>1</sup>Fc-2<sup>+</sup>**

Charge: 1, Multiplicity: 1, NImag: 0

E = -4664.21486560 ht

G = -4663.81812507 ht

|   |             |             |             |
|---|-------------|-------------|-------------|
| H | -0.04663900 | 0.54595100  | -0.28129000 |
| C | -0.00991400 | 1.62589000  | -0.31036300 |
| C | -1.20170900 | 2.35351200  | -0.29424000 |
| C | 1.22627400  | 2.27191500  | -0.34024200 |
| C | 1.22682100  | 3.66566700  | -0.34897200 |
| C | -1.11749200 | 3.74062400  | -0.29380400 |
| H | 2.14646300  | 4.22995700  | -0.37388700 |
| H | -1.99719600 | 4.36600900  | -0.26394000 |
| N | -4.66464600 | 1.87576500  | 0.13527500  |
| N | -3.56914600 | 2.55474200  | 0.15819700  |
| C | -2.52929800 | 1.77709200  | -0.24868800 |
| C | -3.03708300 | 0.52512200  | -0.56894400 |
| N | -4.36523200 | 0.62478300  | -0.30852200 |
| C | 2.52129200  | 1.62165200  | -0.35498500 |
| C | 2.94251700  | 0.30178100  | -0.24354300 |
| N | 4.29658600  | 0.37272100  | -0.31175600 |
| N | 4.69194200  | 1.66429000  | -0.47398000 |
| N | 3.63280300  | 2.39584400  | -0.49630500 |
| N | 0.07732000  | 4.35334700  | -0.31924100 |
| C | -5.38889100 | -0.33464500 | -0.48662700 |

|    |             |             |             |
|----|-------------|-------------|-------------|
| C  | -6.59713900 | -0.10122200 | -1.20960800 |
| C  | -5.37249500 | -1.68465000 | -0.01962600 |
| C  | -7.32320400 | -1.32057400 | -1.19941600 |
| H  | -6.88335200 | 0.83283600  | -1.66565200 |
| C  | -6.57490100 | -2.28951600 | -0.47482200 |
| H  | -4.59485300 | -2.14600000 | 0.56818800  |
| H  | -8.29326700 | -1.47559300 | -1.64364700 |
| H  | -6.87965100 | -3.30437500 | -0.27633500 |
| C  | 5.25318500  | -0.67030300 | -0.29955900 |
| C  | 5.37360400  | -1.69978100 | 0.68376200  |
| C  | 6.23289700  | -0.87474900 | -1.31748600 |
| C  | 6.42592600  | -2.55309200 | 0.25553600  |
| H  | 4.77995000  | -1.79968700 | 1.57844900  |
| C  | 6.95174200  | -2.04653900 | -0.96549400 |
| H  | 6.38096700  | -0.24441800 | -2.17959900 |
| H  | 6.78394300  | -3.42052700 | 0.78622000  |
| H  | 7.77714900  | -2.46490600 | -1.51874700 |
| Fe | 7.08151400  | -0.65033900 | 0.49884000  |
| Fe | -6.96441000 | -0.67566000 | 0.68903300  |
| C  | 8.62968200  | -0.74642400 | 1.80853000  |
| C  | 7.56607100  | 0.02175300  | 2.35582000  |
| C  | 9.03827000  | -0.12813800 | 0.59535600  |
| H  | 9.03804000  | -1.65261800 | 2.22679800  |
| C  | 7.31642400  | 1.11172300  | 1.48013400  |
| H  | 7.02689000  | -0.20047000 | 3.26306300  |
| C  | 8.22450500  | 1.02017200  | 0.39090500  |
| H  | 9.81046100  | -0.48486800 | -0.06747400 |
| H  | 6.54665500  | 1.85828400  | 1.59357600  |
| H  | 8.26339300  | 1.68783500  | -0.45501600 |
| C  | -8.15735800 | -1.33078200 | 2.19538300  |
| C  | -8.78165800 | -0.26635000 | 1.48928300  |
| C  | -6.92466300 | -0.84929300 | 2.71469700  |
| H  | -8.54017800 | -2.33371400 | 2.29768500  |
| C  | -7.93282800 | 0.87197400  | 1.56921900  |
| H  | -9.72042000 | -0.32213700 | 0.96157500  |
| C  | -6.78664900 | 0.51022000  | 2.32738800  |
| H  | -6.20907100 | -1.42417800 | 3.28093500  |
| H  | -8.10710000 | 1.83186400  | 1.10979500  |
| H  | -5.94337400 | 1.15033400  | 2.53278700  |
| C  | 0.11025200  | 5.82191600  | -0.34023900 |
| H  | 1.12971700  | 6.15839100  | -0.19161500 |
| H  | -0.25538500 | 6.17804800  | -1.30012400 |
| H  | -0.52296800 | 6.20722500  | 0.45342000  |
| I  | 1.93382200  | -1.48580500 | -0.07167100 |
| I  | -2.18396100 | -1.12282600 | -1.46232300 |

### **<sup>1</sup>Fc-2<sup>3+</sup>**

Charge: 3, Multiplicity: 1, NImag: 0

E = -4663.53695544 ht

G = -4663.14159591 ht

|   |             |            |             |
|---|-------------|------------|-------------|
| H | -0.01702800 | 0.35113500 | -0.18471500 |
| C | 0.00442800  | 1.43214200 | -0.21077600 |
| C | 1.23257900  | 2.09668400 | -0.25366500 |
| C | -1.19351000 | 2.14657800 | -0.20761400 |
| C | -1.12153000 | 3.53716000 | -0.23709700 |
| C | 1.21839100  | 3.48588700 | -0.29093000 |

|    |             |             |             |
|----|-------------|-------------|-------------|
| H  | -2.00846500 | 4.15284000  | -0.22789400 |
| H  | 2.12786500  | 4.06673300  | -0.33748000 |
| N  | 4.68490000  | 1.50441800  | -0.66065700 |
| N  | 3.61528900  | 2.20946000  | -0.66532900 |
| C  | 2.54097700  | 1.45629200  | -0.29225400 |
| C  | 2.99629600  | 0.17395000  | -0.01838000 |
| N  | 4.33768700  | 0.24518000  | -0.25591900 |
| C  | -2.52968400 | 1.56752900  | -0.17718400 |
| C  | -3.03495500 | 0.29772200  | -0.41977200 |
| N  | -4.38158000 | 0.44488100  | -0.26215800 |
| N  | -4.68745000 | 1.73913100  | 0.05185000  |
| N  | -3.58309800 | 2.38819000  | 0.09982700  |
| N  | 0.06057400  | 4.16474300  | -0.27845700 |
| C  | 5.32345500  | -0.76177500 | -0.23112000 |
| C  | 5.68379800  | -1.56293200 | 0.88146900  |
| C  | 6.15481000  | -1.09567300 | -1.34324200 |
| C  | 6.71553300  | -2.42515500 | 0.44915200  |
| H  | 5.25943200  | -1.50831600 | 1.87172300  |
| C  | 7.01334400  | -2.14233200 | -0.91210000 |
| H  | 6.10824500  | -0.64984600 | -2.32440800 |
| H  | 7.23088000  | -3.13870500 | 1.07432600  |
| H  | 7.75840600  | -2.63436400 | -1.51734300 |
| C  | -5.41853800 | -0.48810100 | -0.47332100 |
| C  | -6.42305000 | -0.37341600 | -1.47773400 |
| C  | -5.62057400 | -1.70851900 | 0.23037400  |
| C  | -7.23823800 | -1.53771700 | -1.38325100 |
| H  | -6.52165500 | 0.44381900  | -2.17527100 |
| C  | -6.74163200 | -2.35215900 | -0.33548800 |
| H  | -5.04935900 | -2.04702900 | 1.08230400  |
| H  | -8.10365100 | -1.75398100 | -1.99089600 |
| H  | -7.16484600 | -3.28735300 | -0.00393100 |
| Fe | -7.30448400 | -0.43543300 | 0.36870100  |
| Fe | 7.34582200  | -0.43691300 | 0.18915300  |
| C  | -9.05921900 | -0.55838200 | 1.54155400  |
| C  | -9.20488400 | 0.42454000  | 0.53582800  |
| C  | -7.94443800 | -0.20232700 | 2.33568400  |
| H  | -9.66773800 | -1.44178400 | 1.65850000  |
| C  | -8.17311100 | 1.39174600  | 0.69513400  |
| H  | -9.93821000 | 0.40620700  | -0.25698500 |
| C  | -7.39000300 | 1.00388300  | 1.81644000  |
| H  | -7.55927800 | -0.77453200 | 3.16636600  |
| H  | -8.00292200 | 2.25737300  | 0.07452300  |
| H  | -6.52611800 | 1.53053400  | 2.18929400  |
| C  | 9.28328300  | -0.18003400 | 0.98406100  |
| C  | 8.33159100  | 0.51529100  | 1.76991100  |
| C  | 9.21869600  | 0.30865900  | -0.34380500 |
| H  | 9.90271000  | -0.99767300 | 1.32316900  |
| C  | 7.67572800  | 1.44775900  | 0.92815900  |
| H  | 8.13233900  | 0.34938200  | 2.81703600  |
| C  | 8.22422400  | 1.31939500  | -0.38503500 |
| H  | 9.80393100  | -0.04401000 | -1.17876000 |
| H  | 6.88560100  | 2.12151500  | 1.21982000  |
| H  | 7.91814300  | 1.87495500  | -1.25788700 |
| C  | 0.10800700  | 5.63878000  | -0.32032500 |
| H  | -0.90201000 | 6.02908800  | -0.27994700 |
| H  | 0.67682000  | 6.00211400  | 0.53101200  |
| H  | 0.58808000  | 5.95420700  | -1.24281300 |

I -2.18431300 -1.47723700 -1.02414400  
I 2.06882500 -1.55269100 0.61157600

**<sup>3</sup>Fc-2<sup>3+</sup>**

Charge: 3, Multiplicity: 3, NImag: 0

E = -4663.53720158 ht

G = -4663.14238038 ht

|    |             |             |             |
|----|-------------|-------------|-------------|
| H  | 0.02380100  | 0.34925400  | -0.19888800 |
| C  | 0.00280600  | 1.43010300  | -0.23053500 |
| C  | 1.20100600  | 2.14398700  | -0.23789600 |
| C  | -1.22532700 | 2.09511600  | -0.26793500 |
| C  | -1.21032700 | 3.48429900  | -0.30982900 |
| C  | 1.12989200  | 3.53441600  | -0.27147600 |
| H  | -2.11978600 | 4.06551800  | -0.35205800 |
| H  | 2.01707600  | 4.14979900  | -0.26986500 |
| N  | 4.69452400  | 1.73381100  | 0.01153600  |
| N  | 3.59077800  | 2.38207000  | 0.07116000  |
| C  | 2.53708600  | 1.56405600  | -0.21305100 |
| C  | 3.04103800  | 0.29644000  | -0.47108200 |
| N  | 4.38814200  | 0.44258700  | -0.31644000 |
| C  | -2.53441900 | 1.45560000  | -0.29463300 |
| C  | -2.98757900 | 0.17185800  | -0.02319200 |
| N  | -4.33157300 | 0.24551800  | -0.24454900 |
| N  | -4.68245400 | 1.50728500  | -0.63791900 |
| N  | -3.61245900 | 2.21153800  | -0.65101700 |
| N  | -0.05217300 | 4.16257100  | -0.30691700 |
| C  | 5.43259400  | -0.47834600 | -0.53698900 |
| C  | 5.61941800  | -1.71667400 | 0.12946500  |
| C  | 6.49626100  | -0.28280100 | -1.47224100 |
| C  | 6.78002600  | -2.30600900 | -0.41752600 |
| H  | 4.99638100  | -2.11924200 | 0.91272700  |
| C  | 7.32702000  | -1.43175800 | -1.39370100 |
| H  | 6.61798500  | 0.56778300  | -2.12456100 |
| H  | 7.21501200  | -3.23919400 | -0.09218400 |
| H  | 8.21808000  | -1.60562300 | -1.97623700 |
| C  | -5.31753300 | -0.76132200 | -0.21431800 |
| C  | -6.15684100 | -1.09370000 | -1.32106100 |
| C  | -5.66915100 | -1.56521200 | 0.89920200  |
| C  | -7.01166000 | -2.14155000 | -0.88562900 |
| H  | -6.11781800 | -0.64603300 | -2.30173300 |
| C  | -6.70354500 | -2.42704200 | 0.47262400  |
| H  | -5.23746900 | -1.51265600 | 1.88642500  |
| H  | -7.76121000 | -2.63257000 | -1.48614000 |
| H  | -7.21431800 | -3.14179800 | 1.10019300  |
| Fe | -7.33582800 | -0.43743600 | 0.22149700  |
| Fe | 7.27889600  | -0.43002800 | 0.41385800  |
| C  | -9.26928700 | -0.18234700 | 1.02667800  |
| C  | -9.21147100 | 0.31379800  | -0.29853500 |
| C  | -8.31196200 | 0.50710900  | 1.81121600  |
| H  | -9.88808200 | -1.00100400 | 1.36449600  |
| C  | -8.21579600 | 1.32311700  | -0.33967300 |
| H  | -9.80147500 | -0.03372300 | -1.13230100 |
| C  | -7.65938200 | 1.44345900  | 0.97096500  |
| H  | -8.10744500 | 0.33536500  | 2.85638200  |
| H  | -7.91335400 | 1.88248800  | -1.21137800 |
| H  | -6.86719700 | 2.11503700  | 1.26198700  |

|   |             |             |             |
|---|-------------|-------------|-------------|
| C | 8.98165000  | -0.59290500 | 1.64788600  |
| C | 7.82001700  | -0.33910300 | 2.42144600  |
| C | 9.14939800  | 0.46412400  | 0.72263800  |
| H | 9.59534500  | -1.48023000 | 1.70489800  |
| C | 7.26621700  | 0.88897100  | 1.97727300  |
| H | 7.42571000  | -0.97366100 | 3.19953400  |
| C | 8.09098200  | 1.38538600  | 0.92165100  |
| H | 9.92634800  | 0.53742100  | -0.02243900 |
| H | 6.37206600  | 1.35945700  | 2.35426000  |
| H | 7.91841200  | 2.28640200  | 0.35340000  |
| C | -0.09901300 | 5.63650700  | -0.35453400 |
| H | -0.67204800 | 6.00309700  | 0.49251600  |
| H | 0.91090300  | 6.02672700  | -0.31053400 |
| H | -0.57433900 | 5.94858600  | -1.28066900 |
| I | -2.05508900 | -1.56041000 | 0.58328400  |
| I | 2.18341800  | -1.46604800 | -1.10047800 |

## 12. References

- 1 Bruker. *APEX / SAINT*. Bruker AXS Inc., Madison, Wisconsin, USA, **2012**  
<https://www.bruker.com/en/products-and-solutions/diffractometers-and-x-ray-microscopes/single-crystal-x-ray-diffractometers/sc-xrd-software/apex.html> (accessed 2023-06-26).
- 2 Rigaku Oxford Diffraction. *CrysAlisPro*. Rigaku Corp., Oxford, UK, **2020**  
<https://rigaku.com/products/crystallography/x-ray-diffraction/crysalispro>.
- 3 Sheldrick, G. M. *SHELXT* – Integrated Space-Group and Crystal-Structure Determination. *Acta Crystallogr A Found Adv* **2015**, *71* (1), 3–8. <https://doi.org/10.1107/S2053273314026370>.
- 4 Sheldrick, G. M. Crystal Structure Refinement with *SHELXL*. *Acta Crystallogr C Struct Chem* **2015**, *71* (1), 3–8.  
<https://doi.org/10.1107/S2053229614024218>.
- 5 Dolomanov, O. V.; Bourhis, L. J.; Gildea, R. J.; Howard, J. A. K.; Puschmann, H. *OLEX2* : A Complete Structure Solution, Refinement and Analysis Program. *J Appl Crystallogr* **2009**, *42* (2), 339–341.  
<https://doi.org/10.1107/S0021889808042726>.
- 6 Farrugia, L. J. *WinGX* and *ORTEP* for Windows: an update. *J. Appl. Crystallogr.* **2012**, *45*, 849–854.
- 7 S. Vanicek, M. Jochriem, C. Hassenrück, S. Roy, H. Kopacka, K. Wurst, T. Müller, R. F. Winter, E. Reisner, B. Bildstein, *Organometallics*, **2019**, *38*(6), 1361-1371. <https://doi.org/10.1021/acs.organomet.8b00681>
- 8 S. Opascharoenboon, S. Vigromsittet, N. Cheevathanomsak, I. Atirojwanich, J. Tantirungrotechai, M. Sukwattanasinitt, P. Surawatanawong, P. D. Beer, T. Bunchuay, *Chem. Asian J.* **2025**, *20*, e202401833.  
<https://doi.org/10.1002/asia.202401833>
- 9 J. Y. C. Lim, P. D. Beer, *Eur. J. Inorg. Chem.* **2017**, *2*, 220-224. <https://doi.org/10.1002/ejic.201600805>
- 10 N. G. White, P. D. Beer, *Chem. Commun.* **2012**, *48*, 8499-8501. <https://doi.org/10.1039/c2cc34210c>
